# Supplementary material for: Photophysics of proton transfer in hydrazides: a combined theoretical and experimental analysis towards OLED device application
Source: Royal Society of Chemistry journal article supplement (doi:10.1039/c9nj01503e), 2019-01-01
Supplement: c9nj01503e1.pdf [file c9nj01503e1.pdf]

## SUPPLEMENTARY INFORMATION

### Photophysics of Proton Transfer in Hydrazides: A Combined Theoretical and Experimental Analysis towards OLED Device Application

Makesh Mohan <sup>a</sup>, M. N. Satyanarayan <sup>a,\*</sup> and Darshak R. Trivedi <sup>b,\*</sup>

<sup>a</sup> *Optoelectronics Laboratory, Department of Physics, National Institute of Technology Karnataka (NITK) Surathkal, Mangalore-575025.*

<sup>b</sup> *Supramolecular Chemistry Laboratory, Department of Chemistry, National Institute of Technology Karnataka (NITK) Surathkal, Mangalore-575025*

*\*Author to whom correspondence should be addressed Email: satya\_mn@nitk.edu.in, darshak\_rtrivedi@yahoo.co.in Tel: +91-824-2473295*

| Sl.No | Fig/Table No | Contents                                |
|-------|--------------|-----------------------------------------|
| 1     | S1           | FT-IR spectra of <b>T2</b>              |
| 2     | S2           | FT-IR spectra of <b>P2</b>              |
| 3     | S3           | FT-IR spectra of <b>F2</b>              |
| 4     | S4           | FT-IR spectra of <b>T3</b>              |
| 5     | S5           | FT-IR spectra of <b>P3</b>              |
| 6     | S6           | FT-IR spectra of <b>F3</b>              |
| 7     | S7           | <sup>1</sup> H NMR spectra of <b>T2</b> |
| 8     | S8           | <sup>1</sup> H NMR spectra of <b>P2</b> |
| 9     | S9           | <sup>1</sup> H NMR spectra of <b>F2</b> |
| 10    | S10          | <sup>1</sup> H NMR spectra of <b>T3</b> |
| 11    | S11          | <sup>1</sup> H NMR spectra of <b>P3</b> |
| 12    | S12          | <sup>1</sup> H NMR spectra of <b>F3</b> |
| 13    | S13          | ESI-MS spectra of <b>T2</b>             |
| 14    | S14          | ESI-MS spectra of <b>P2</b>             |
| 15    | S15          | ESI-MS spectra of <b>F2</b>             |

|    |     |                                                                                                                                       |
|----|-----|---------------------------------------------------------------------------------------------------------------------------------------|
| 16 | S16 | ESI-MS spectra of <b>T3</b>                                                                                                           |
| 17 | S17 | ESI-MS spectra of <b>P3</b>                                                                                                           |
| 18 | S18 | ESI-MS spectra of <b>F3</b>                                                                                                           |
| 19 | S19 | UV-Vis absorbance spectra of molecule <b>T2</b> in solvent of varying polarity                                                        |
| 20 | S20 | UV-Vis absorbance spectra of molecule <b>P2</b> in solvent of varying polarity                                                        |
| 21 | S21 | UV-Vis absorbance spectra of molecule <b>F2</b> in solvent of varying polarity                                                        |
| 22 | S22 | UV-Vis absorbance spectra of molecule <b>T3</b> in solvent of varying polarity                                                        |
| 23 | S23 | UV-Vis absorbance spectra of molecule <b>P3</b> in solvent of varying polarity                                                        |
| 24 | S24 | UV-Vis absorbance spectra of molecule <b>F3</b> in solvent of varying polarity                                                        |
| 25 | S25 | Solid State UV-Vis absorbance spectra of all the molecules of the series                                                              |
| 26 | S26 | PL spectra of molecule <b>T2</b> in solvent of varying polarity.                                                                      |
| 27 | S27 | PL spectra of molecule <b>P2</b> in solvent of varying polarity.                                                                      |
| 28 | S28 | PL spectra of molecule <b>F2</b> in solvent of varying polarity.                                                                      |
| 29 | S29 | PL spectra of molecule <b>T3</b> in solvent of varying polarity.                                                                      |
| 30 | S30 | PL spectra of molecule <b>P3</b> in solvent of varying polarity.                                                                      |
| 31 | S31 | PL spectra of molecule <b>F3</b> in solvent of varying polarity.                                                                      |
| 32 | S32 | Fluorescence emission spectrum of <b>T2</b> with varying $f_w$ and inset gives the intensity value with varying $f_w$                 |
| 33 | S33 | Fluorescence emission spectrum of <b>P2</b> with varying $f_w$ and inset gives the intensity value with varying $f_w$                 |
| 34 | S34 | Fluorescence emission spectrum of <b>F2</b> with varying $f_w$ and inset gives the intensity value with varying $f_w$                 |
| 35 | S35 | Fluorescence emission spectrum of <b>T3</b> with varying $f_w$ and inset gives the intensity value with varying $f_w$                 |
| 36 | S36 | Fluorescence emission spectrum of <b>P3</b> with varying $f_w$ and inset gives the intensity value with varying $f_w$                 |
| 37 | S37 | Vibrational stretching frequency of all the molecules in $S_0S_0$ and $S_1S_1$ states; specifically focusing N-H stretching frequency |
| 38 | S38 | Single point energies of molecule <b>P2</b> in the $S_0$ and $S_1$ states calculated by B3LYP and CAM-B3LYP                           |
| 39 | S39 | Single point energies of molecule <b>F2</b> in the $S_0$ and $S_1$ states calculated by B3LYP and CAM-B3LYP                           |
| 40 | S40 | Single point energies of molecule <b>T3</b> in the $S_0$ and $S_1$ states calculated by B3LYP and CAM-B3LYP                           |

- 41      **S41**      Single point energies of molecule **P3** in the  $S_0$  and  $S_1$  states calculated by B3LYP and CAM-B3LYP
- 42      **Table S1**      Vibrational –NH stretching frequency of all molecules at state  $S_0$  and  $S_1$
- 43      **Table S2**      Computed optical parameters of molecules, keto absorbance and emission, enol emission, oscillator strengths, composition and CI(%) calculated at DFT/B3LYP and TD-DFT/CAM-B3LYP for ground and excited state

## Characterization details

### **T2:** (*E*)-*N'*-([2,2'-bithiophen]-5-ylmethylene)thiophene-2-carbohydrazide

Yield: 76 %, melting point: 210 °C, <sup>1</sup>H NMR (DMSO- *d*<sub>6</sub>, 400 MHz, ppm): δ 11.88 (br. s; 1H), 8.59 (s; 1H), 8.01 (m; 1H), 7.89 (br. s; 1H), 7.6 (d; *J*=4.8, 1H), 7.45 (d; *J* = 3.8, 1H), 7.33 (d; *J* = 3.8; 1H), 7.23 (dd; *J*=4.8, 1H), 7.14 (dd; *J*=4.9, 3.8, 1H), FTIR (ATR) (cm<sup>-1</sup>): 3186 (NH), 1622 (CH=N), ESI-MS Calculated: 318.00, Obtained: 318.90(M+H<sup>+</sup>).

### **P2:** (*E*)-*N'*-([2,2'-bithiophen]-5-ylmethylene)nicotinohydrazide

Yield: 79 %, melting point: 234 °C, <sup>1</sup>H NMR (DMSO- *d*<sub>6</sub>, 400 MHz, ppm): δ 12.03 (s; 1H), 9.05 (m; 1H), 8.77 (m; 1H), 8.6 (s; 1H), 8.25 (s; 1H), 7.59 (m; 2H), 7.47 (dd; *J* = 6.7,3.7; 2H), 7.34 (d; *J*= 3.7; 1H), 7.14 (s; 1H), FTIR (ATR) (cm<sup>-1</sup>): 1638 (CH=N), ESI-MS Calculated: 313.39, Obtained: 313.95(M+H<sup>+</sup>).

### **F2:** (*E*)-*N'*-([2,2'-bithiophen]-5-ylmethylene)furan-2-carbohydrazide

Yield: 82%, melting point: 221 °C, <sup>1</sup>H NMR (DMSO- *d*<sub>6</sub>, 400 MHz, ppm): δ 11.90 (br. s; 1H), 8.61 (br. s; 1H), 7.96 (s; 1H), 7.6 (d; *J* = 5; 1H), 7.46 (d; *J*= 3.5, 1H), 7.43 (d; *J* = 3.8, 1H), 7.32 (m; 2H), 7.15 (m; 1H), 6.72 (br.s; 1H), FTIR (ATR) (cm<sup>-1</sup>): 3224 (NH), 3065 (Ar-CH), 1640 (CH=N), ESI-MS Calculated: 302.02, Obtained: 303.00(M+H<sup>+</sup>).

### **T3:** *N',N'''*-((1*E*,1'*E*)-thiophene-2,5-diylbis(methaneylylidene))bis(thiophene-2-carbohydrazide)

Yield: 72 %, melting point: 252 °C, <sup>1</sup>H NMR (DMSO- *d*<sub>6</sub>, 400 MHz, ppm): δ 7.24 (br. s; 2H), 7.49 (s; 2H), 7.9 (br. s; 2H), 8.06 (d; *J* = 1.7; 2H), 8.27 (br. s; 1H), 8.65 (br. s; 1H), 11.98 (br. s; 2H). FTIR (ATR) (cm<sup>-1</sup>): 2939 (NH), 2902 (Ar-CH), 1641 (CH=N). ESI-MS Calculated: 388.48, Obtained: 389(M+H<sup>+</sup>).

### **P3:** *N',N'''*-((1*E*,1'*E*)-thiophene-2,5-diylbis(methaneylylidene))di(nicotinohydrazide)

Yield: 78%, melting point: 276 °C, <sup>1</sup>H NMR (DMSO- *d*<sub>6</sub>, 400 MHz, ppm): δ 7.58 (m; 4H), 8.26 (d; *J* = 8.1, 2H), 8.66 (s; 2H), 8.78 (m; 2H), 9.06 (s; 2H), 12.12 (m; 2H). FTIR (ATR) (cm<sup>-1</sup>): 3209 (NH), 3054 (Ar-CH), 1639 (CH=N). ESI-MS Calculated: 378.41, Obtained: 379.10(M+H<sup>+</sup>).

### **F3:** *N',N'''*-((1*E*,1'*E*)- thiophene- 2,5-diylbis (methaneylylidene)) bis (furan-2-carbohydrazide)

Yield: 76 %, melting point: 260 °C, <sup>1</sup>H NMR (DMSO- *d*<sub>6</sub>, 400 MHz, ppm): δ 6.76 (m; 2H), 7.34 (m; 2H), 7.53 (m; 2H), 7.97 (br. s; 2H), 8.65 (br. s; 2H), 11.98 (br. s; 1H), 11.89 (m; 1H). FTIR (ATR) (cm<sup>-1</sup>): 3135 (NH), 1604 (CH=N). ESI-MS Calculated: 356.36, Obtained: 357(M+H<sup>+</sup>).

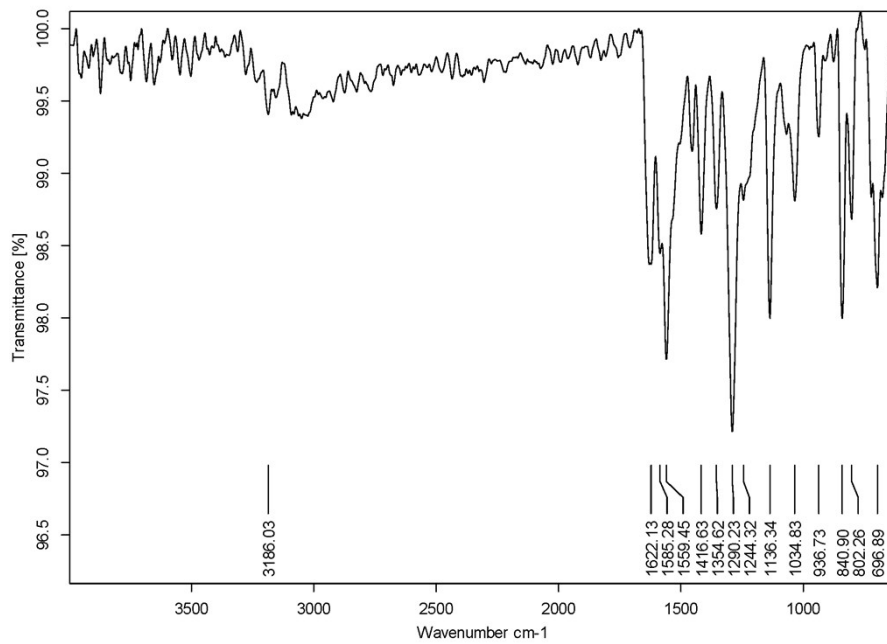

**Figure S1.** FT-IR spectra of **T2**

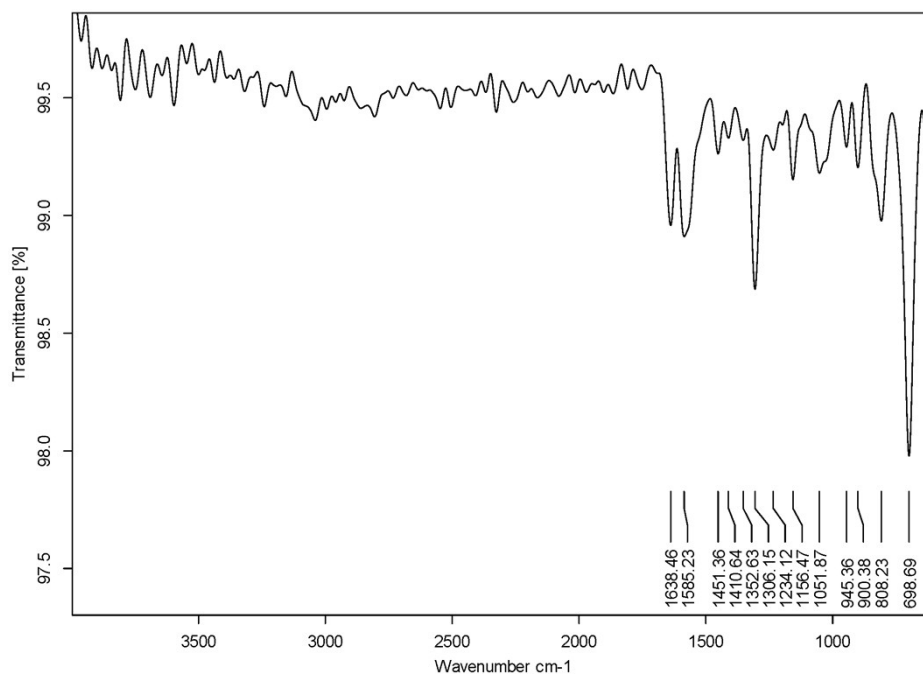

**Figure S2.** FT-IR spectra of **P2**

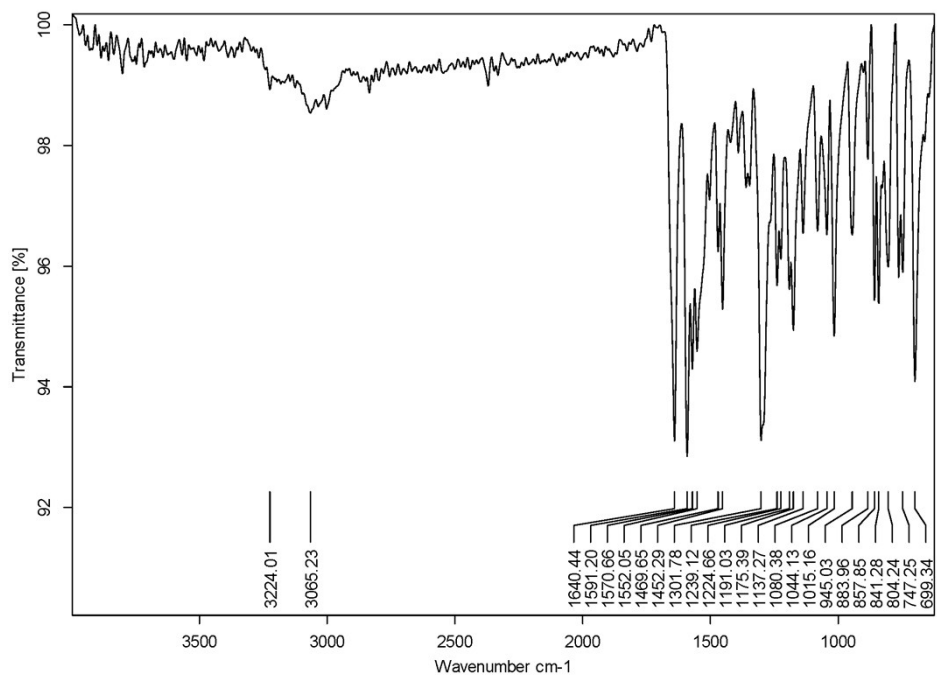

**Figure S3.** FT-IR spectra of **F2**

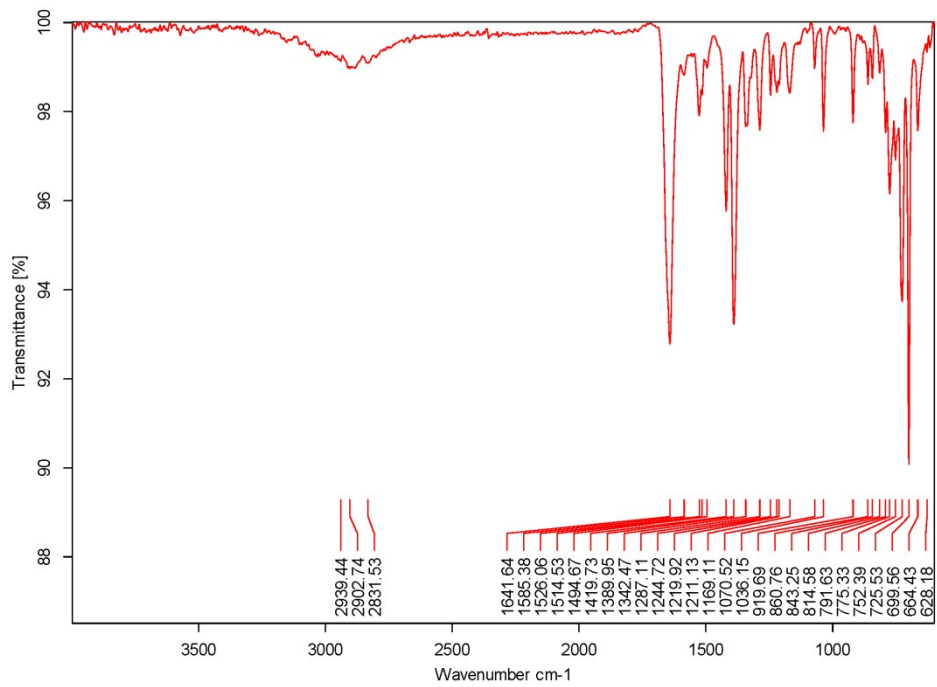

**Figure S4.** FT-IR spectra of **T3**

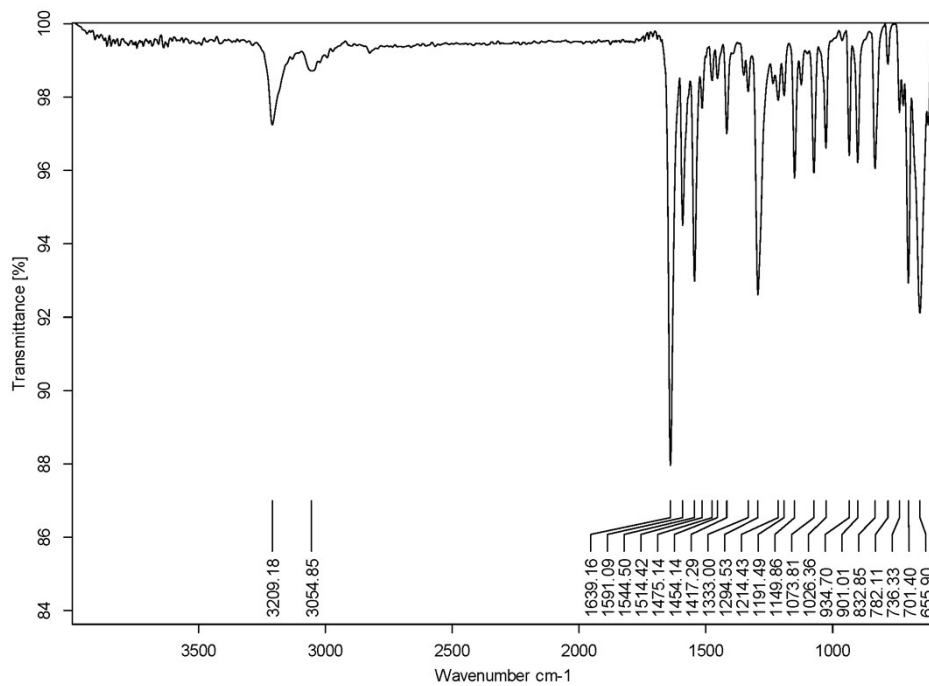

**Figure S5.** FT-IR spectra of **P3**

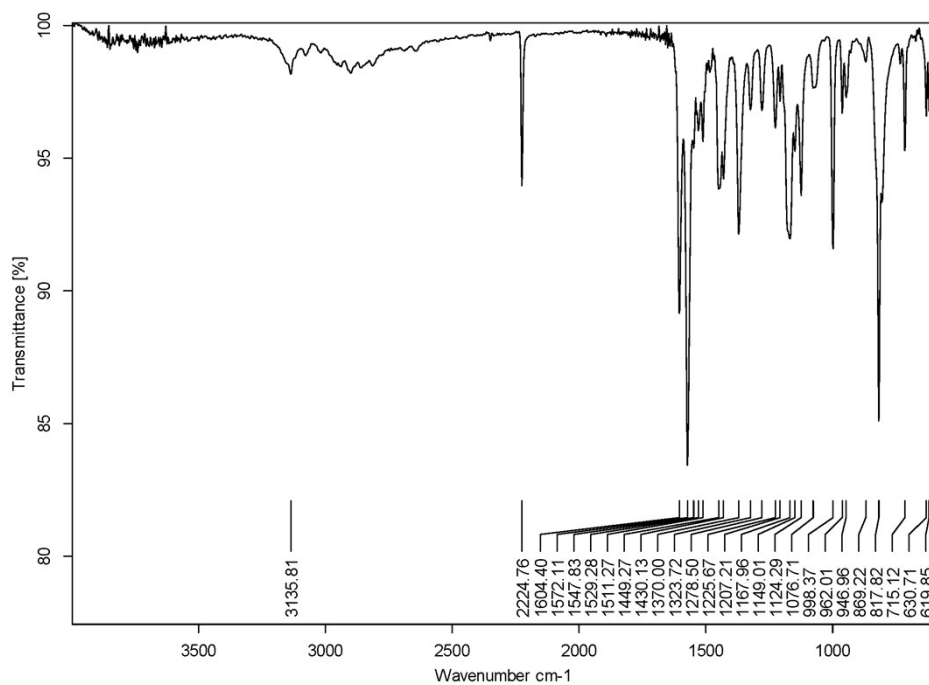

**Figure S6.** FT-IR spectra of **F3**

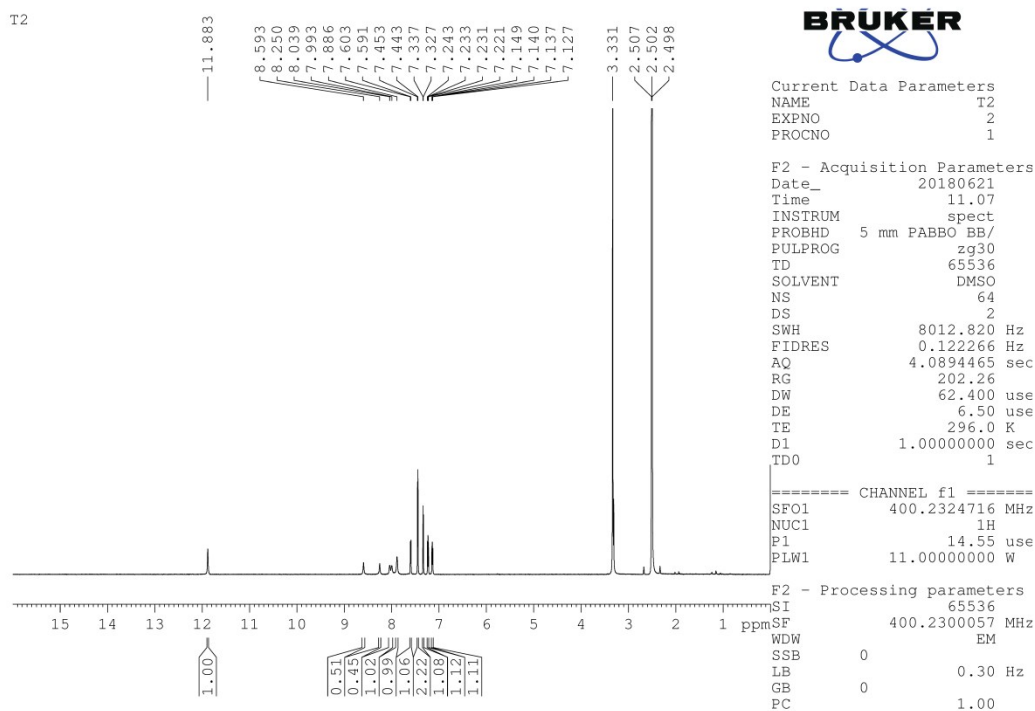

Figure S7. <sup>1</sup>H NMR spectra of T2

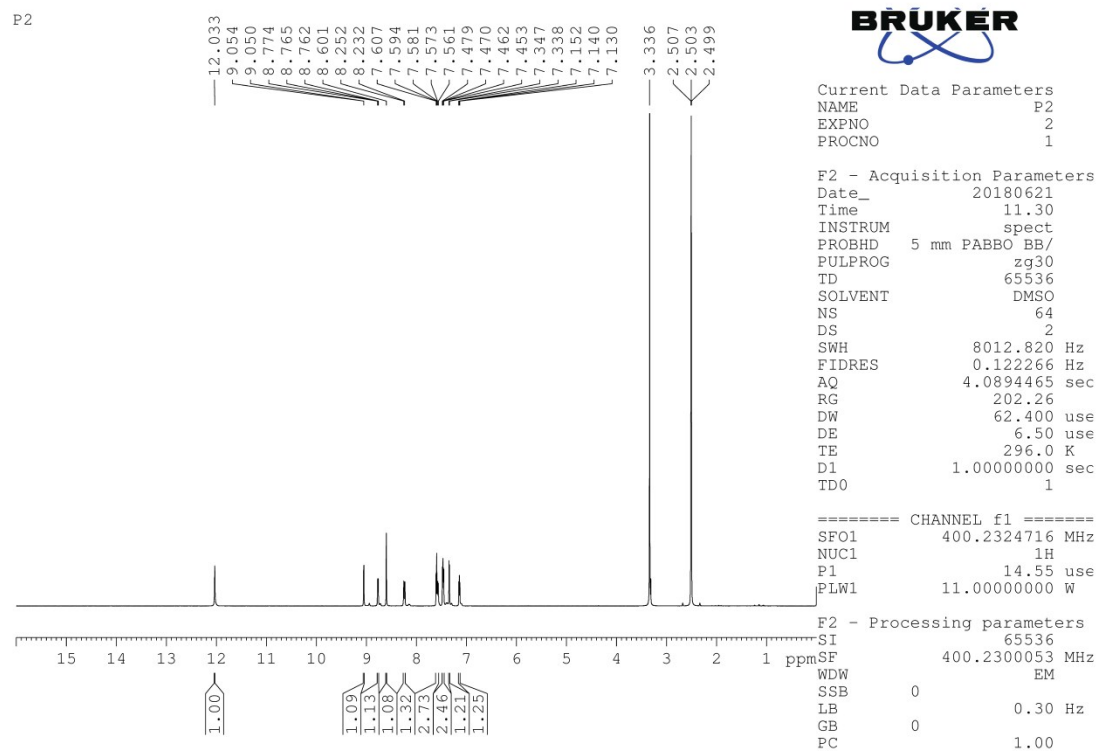

Figure S8. <sup>1</sup>H NMR spectra of P2



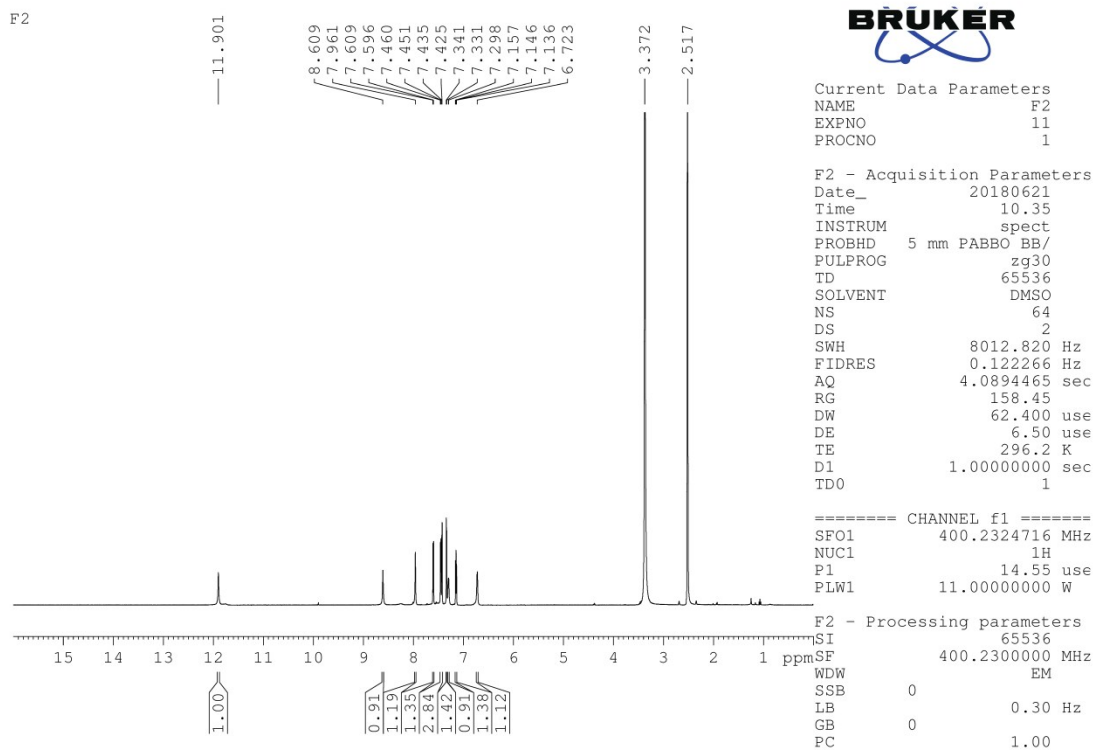

Figure S9. <sup>1</sup>H NMR spectra of F2

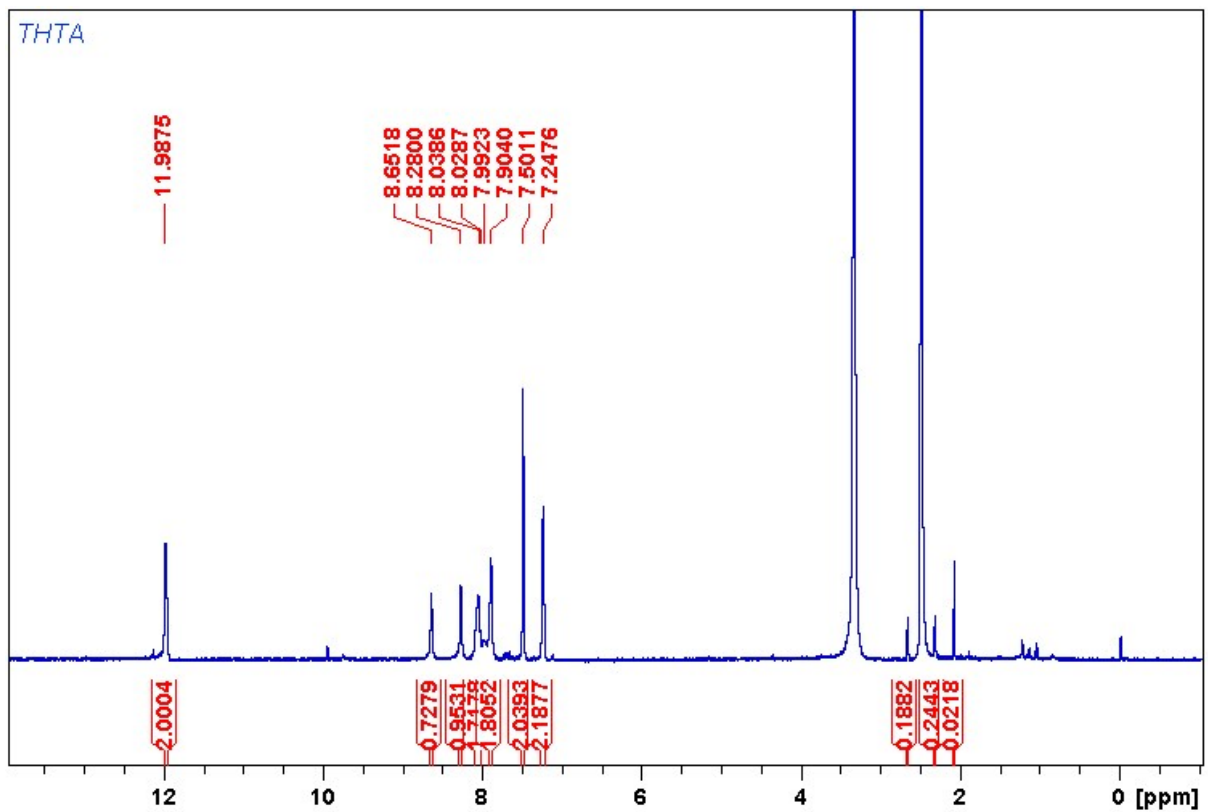

Figure S10. <sup>1</sup>H NMR spectra of T3

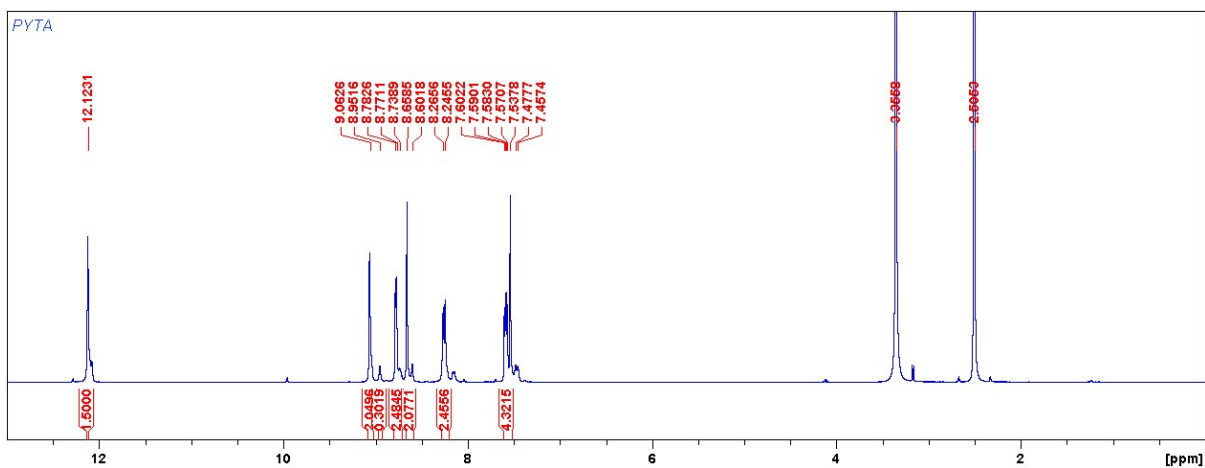

Figure S11.  $^1\text{H}$  NMR spectra of P3

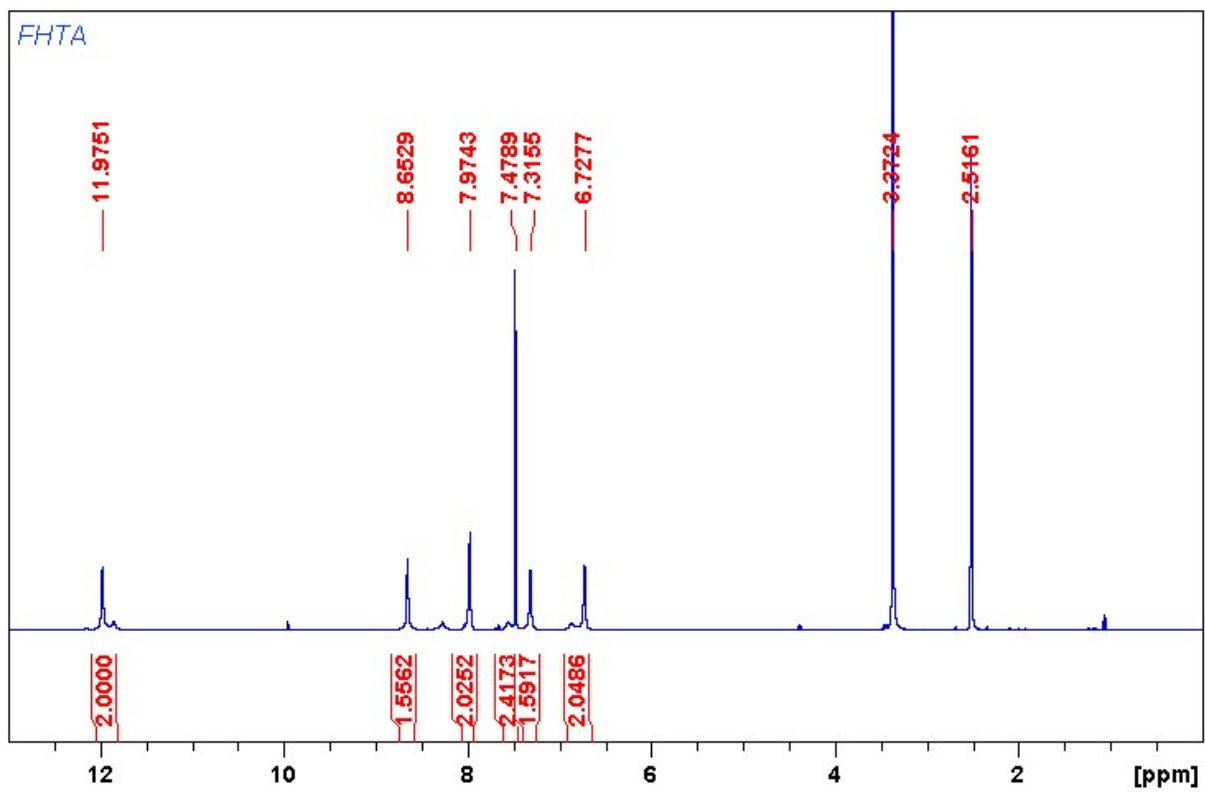

Figure S12.  $^1\text{H}$  NMR spectra of F3

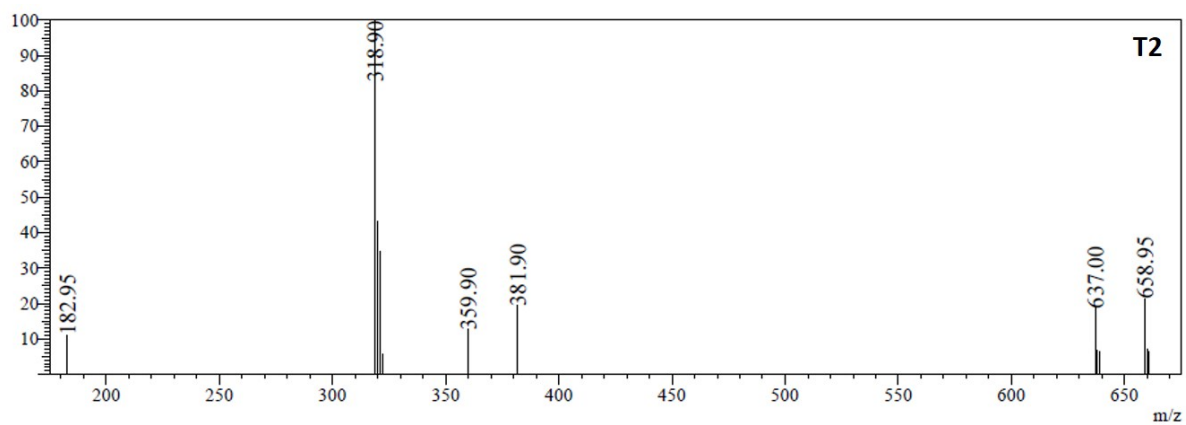

**Figure S13.** ESI-MS spectra of T2

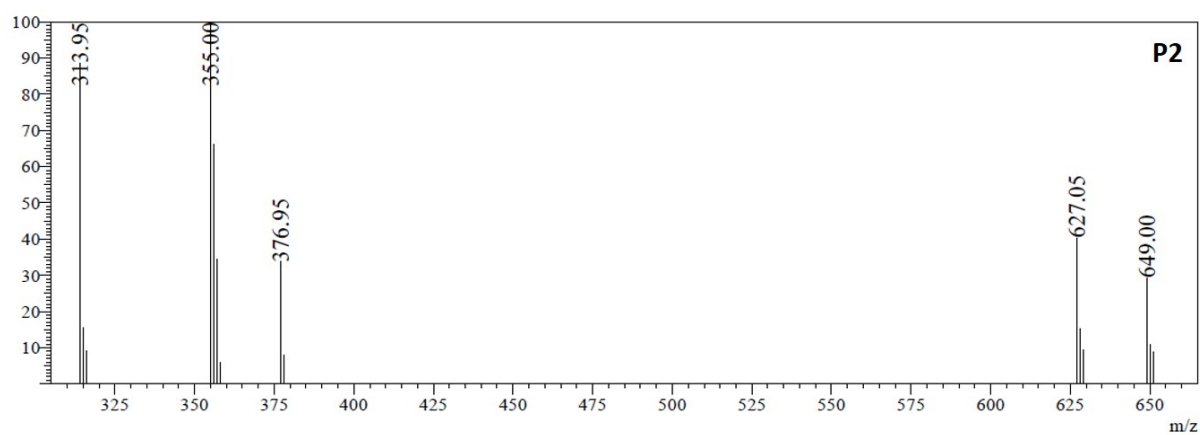

**Figure S14.** ESI-MS spectra of P2

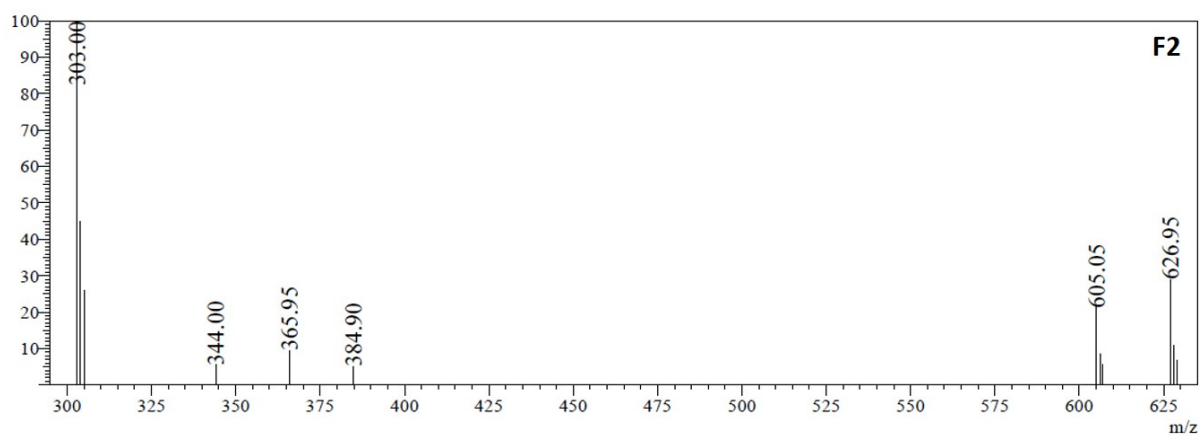

**Figure S15.** ESI-MS spectra of F2

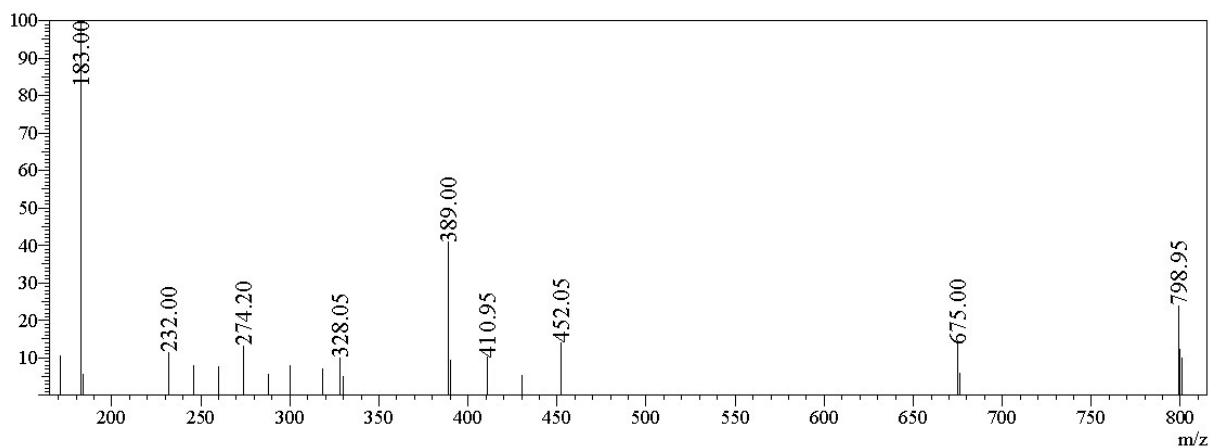

**Figure S16.** ESI-MS spectra of T3

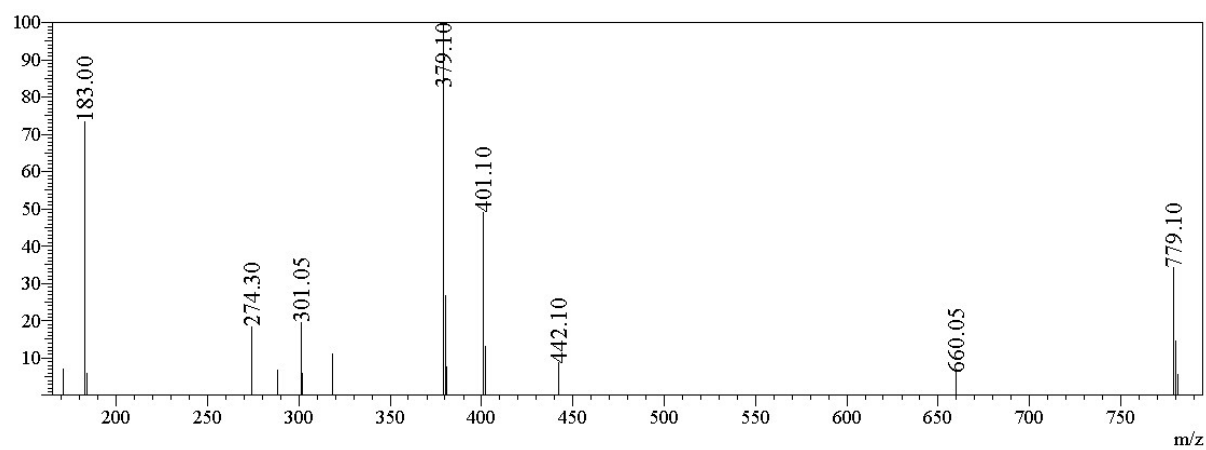

**Figure S17.** ESI-MS spectra of P3

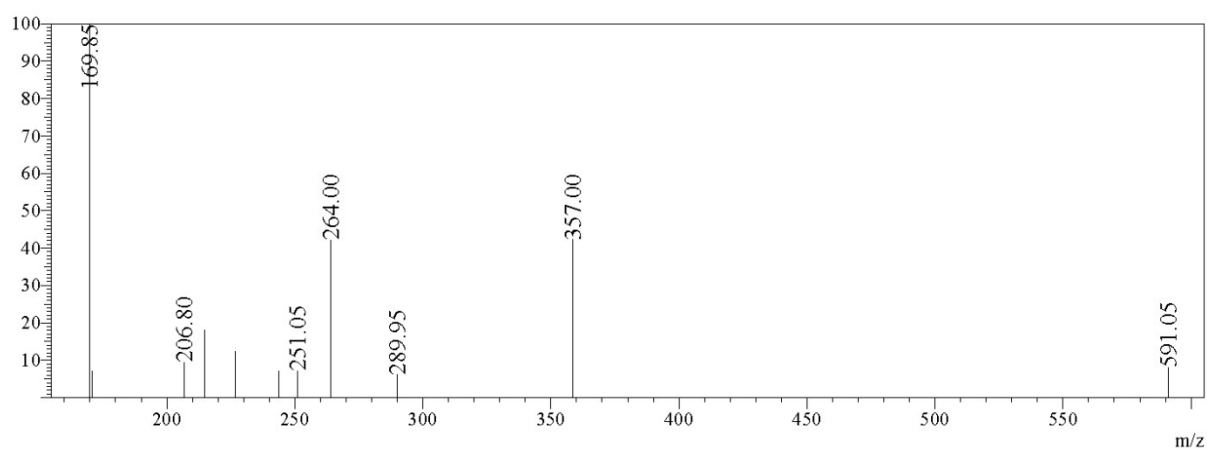

**Figure S18.** ESI-MS spectra of F3

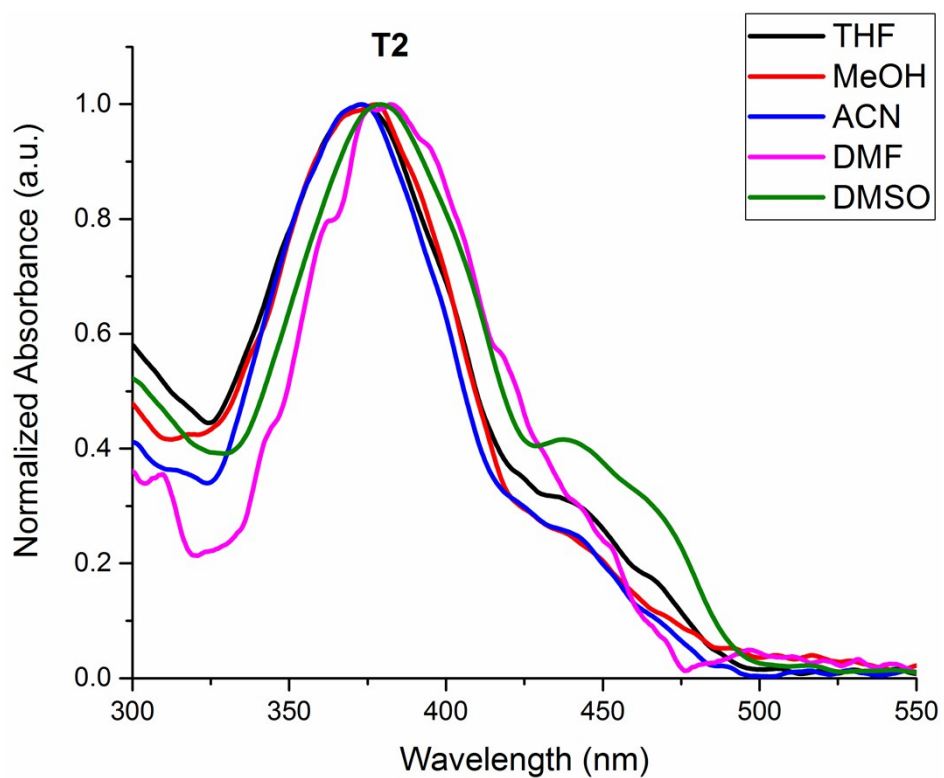

**Figure S19.** UV-Vis absorbance spectra of molecule **T2** in solvent of varying polarity.

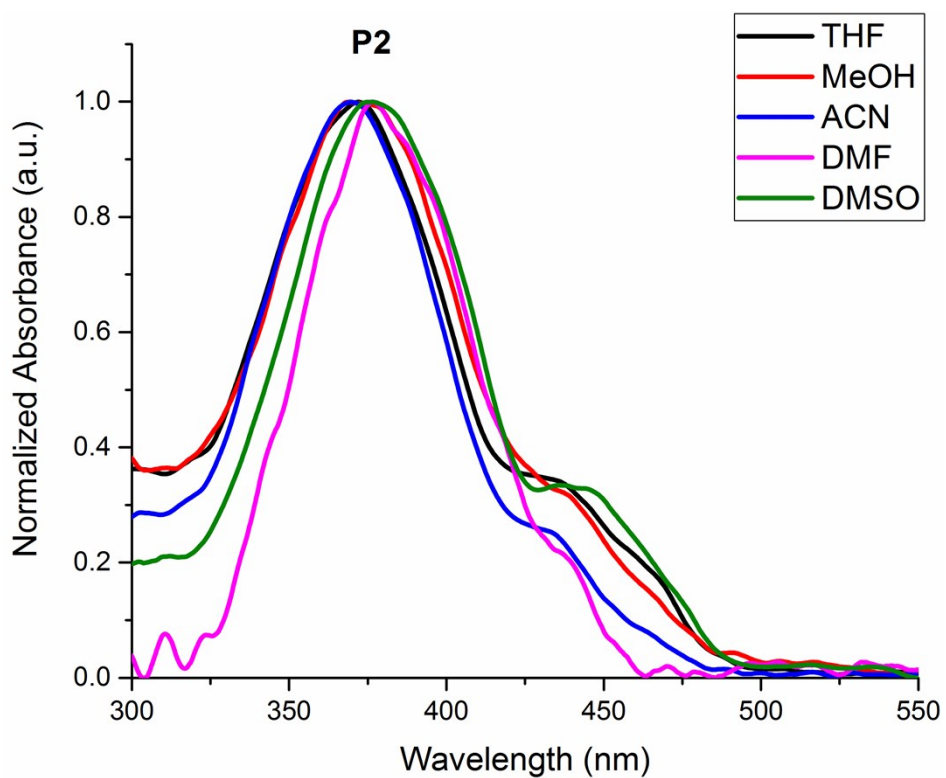

**Figure S20.** UV-Vis absorbance spectra of molecule **P2** in solvent of varying polarity.

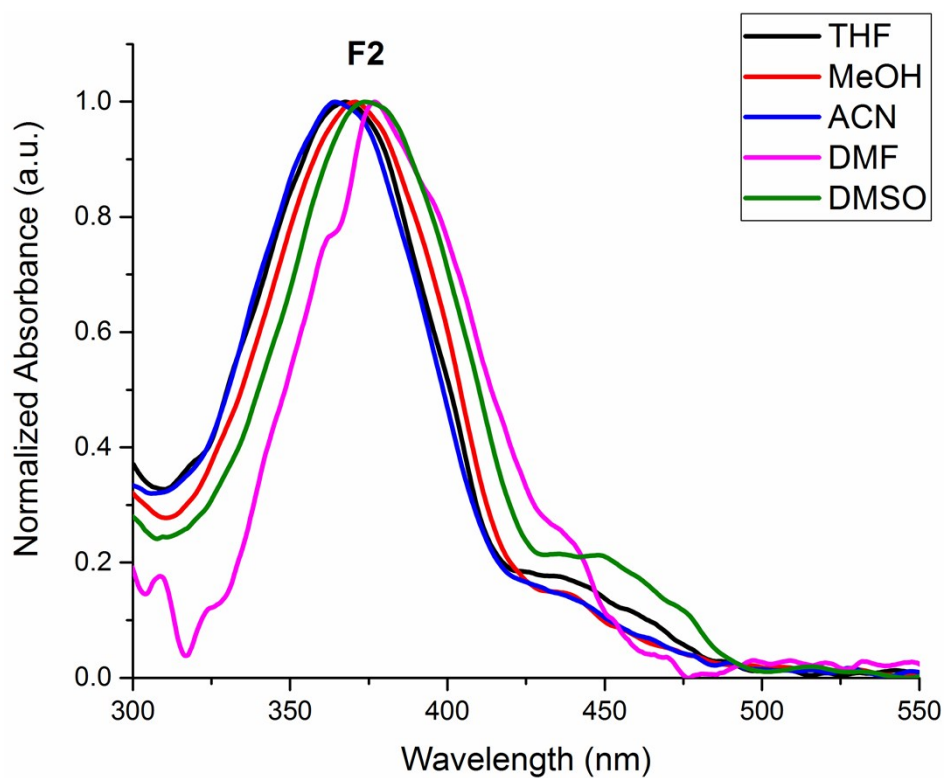

**Figure S21.** UV-Vis absorbance spectra of molecule **F2** in solvent of varying polarity.

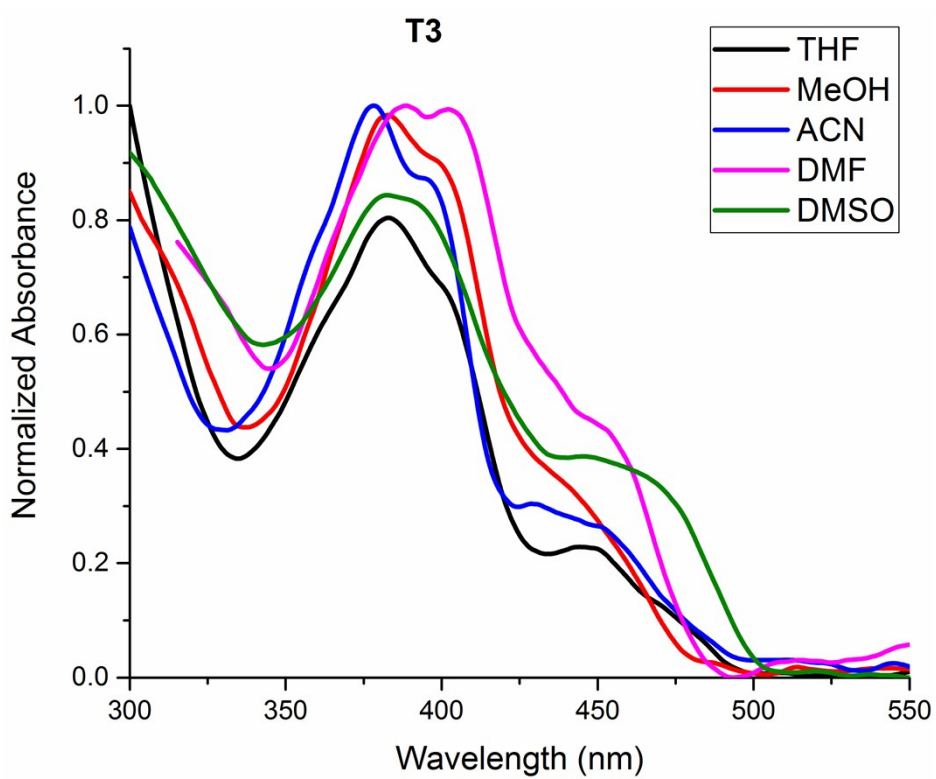

**Figure S22.** UV-Vis absorbance spectra of molecule **T3** in solvent of varying polarity.

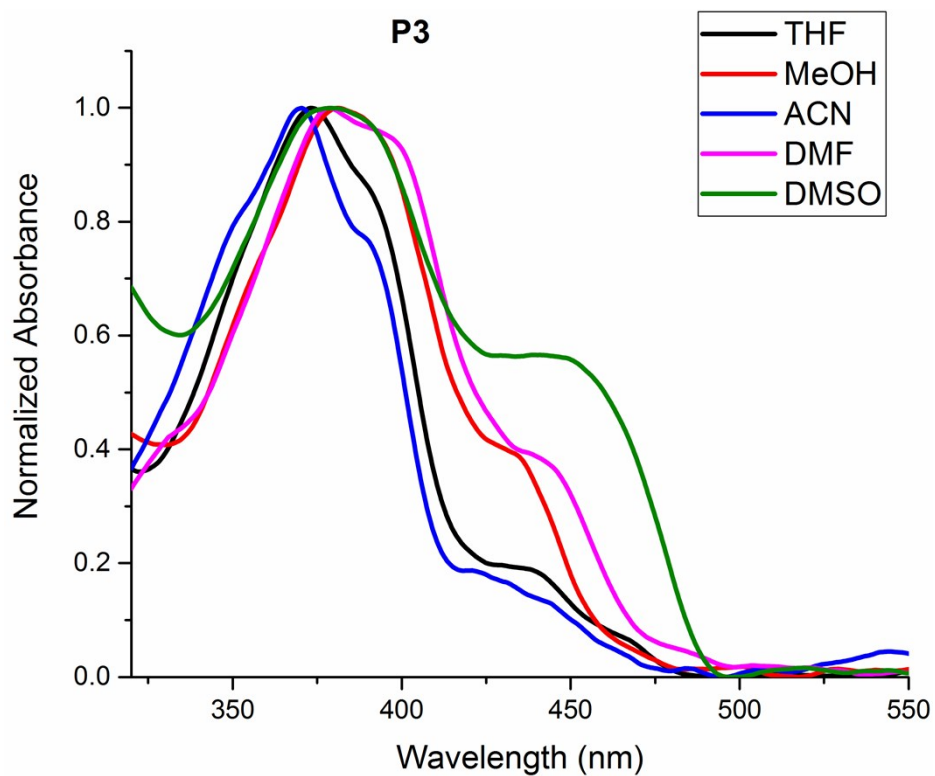

**Figure S23.** UV-Vis absorbance spectra of molecule **P3** in solvent of varying polarity.

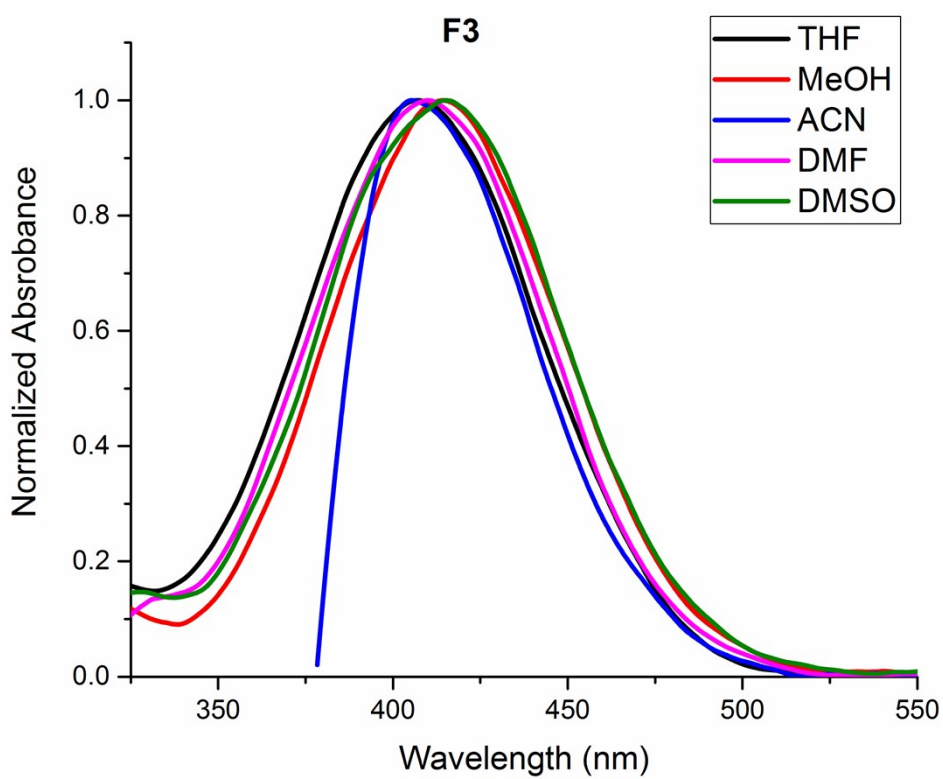

**Figure S24.** UV-Vis absorbance spectra of molecule **F3** in solvent of varying polarity.

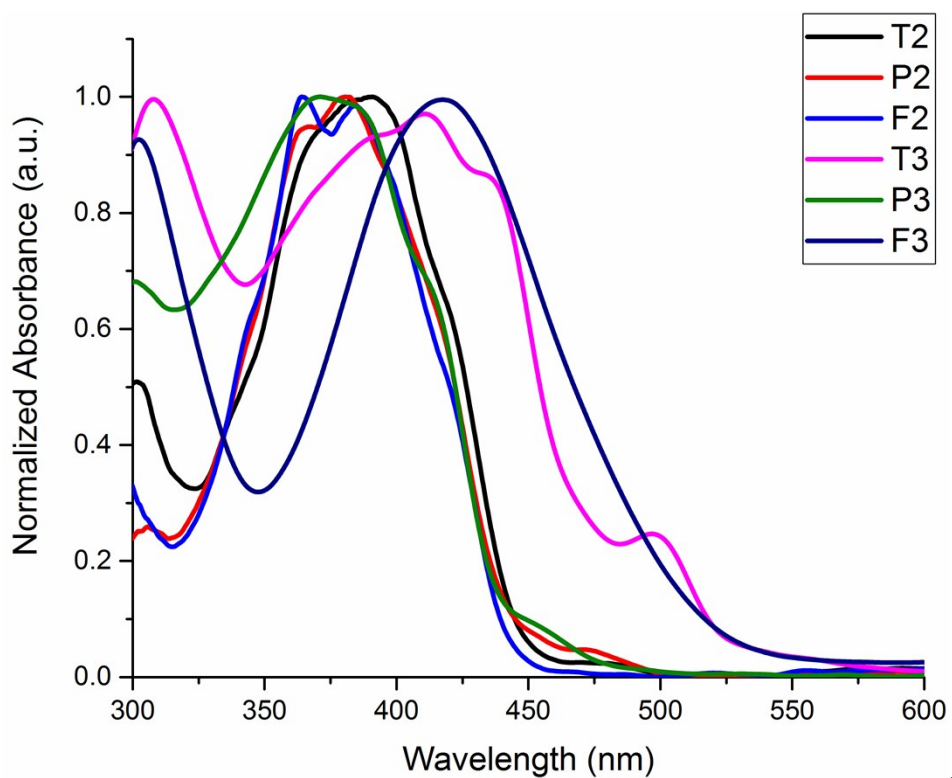

**Figure S25.** Solid State UV-Vis absorbance spectra of all the molecules of the series

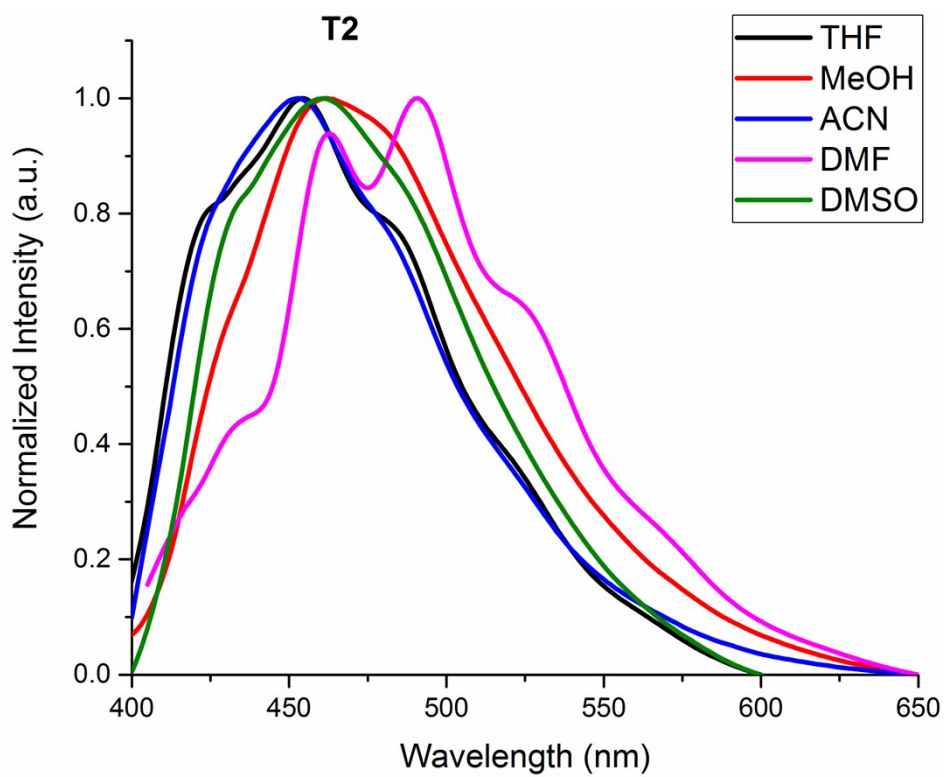

**Figure S26.** PL spectra of molecule T2 in solvent of varying polarity.



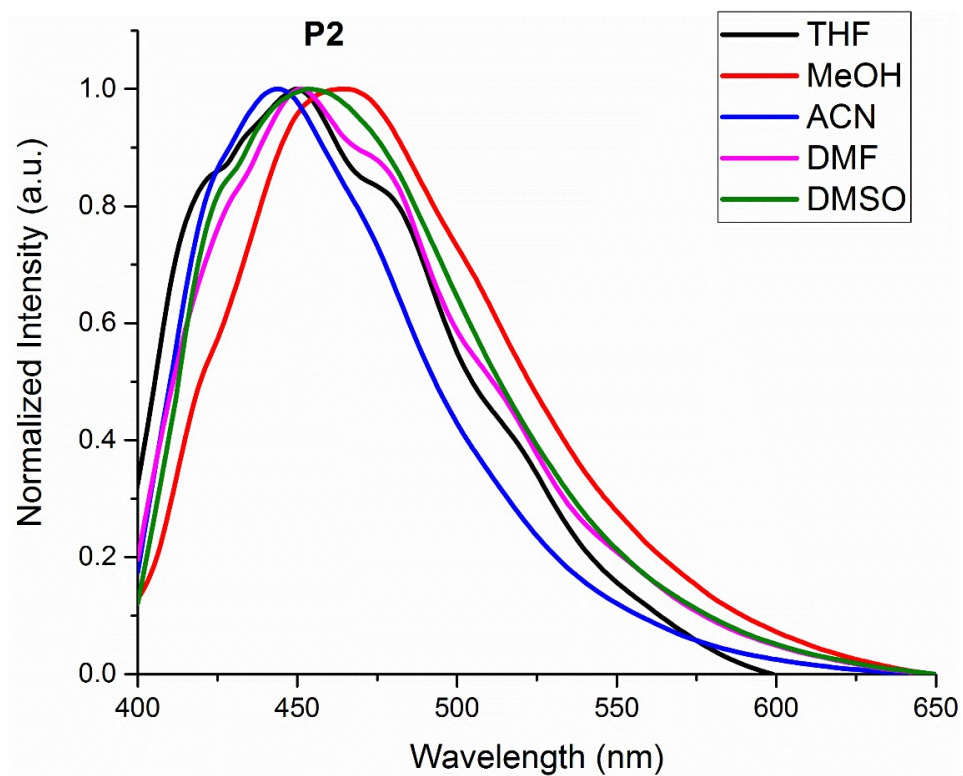

**Figure S27.** PL spectra of molecule **P2** in solvent of varying polarity.

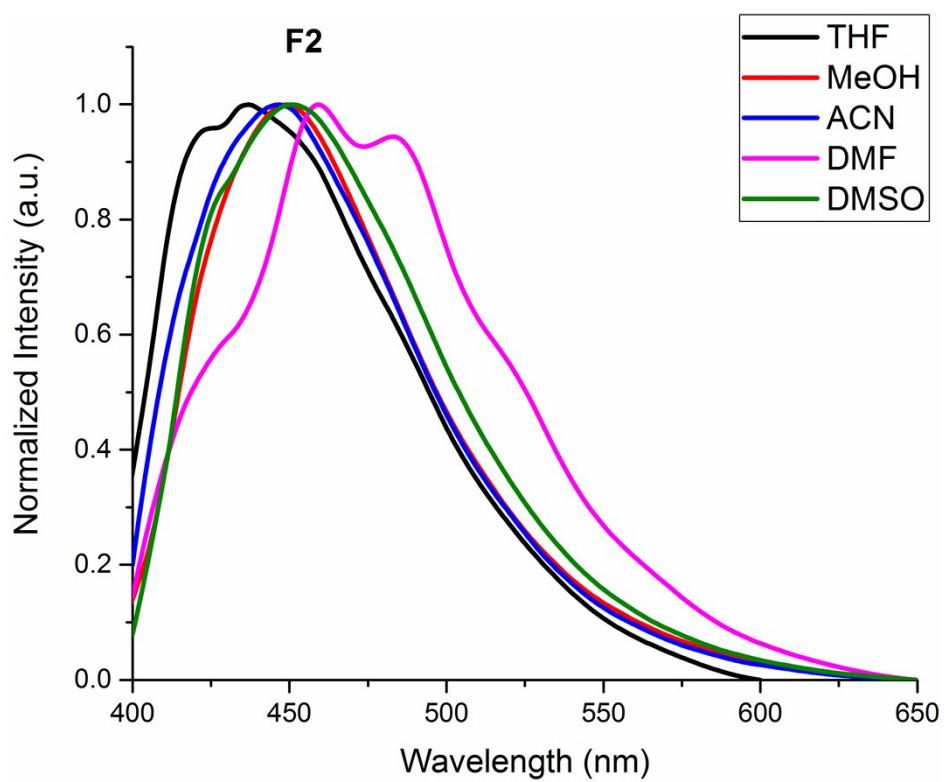

**Figure S28.** PL spectra of molecule **F2** in solvent of varying polarity.

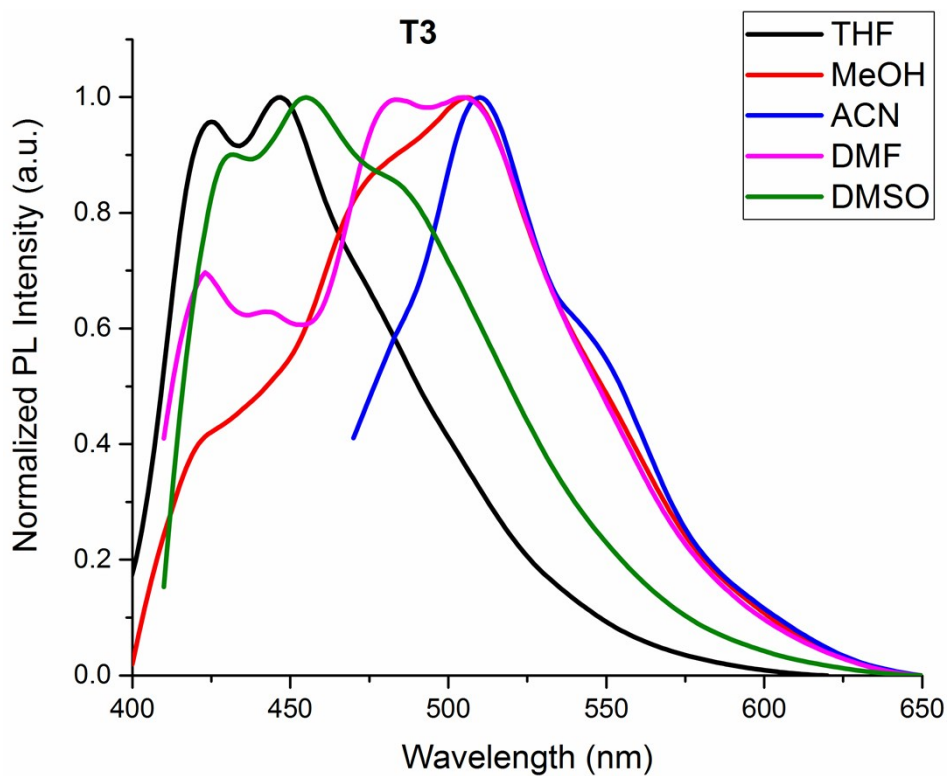

**Figure S29.** PL spectra of molecule **T3** in solvent of varying polarity.

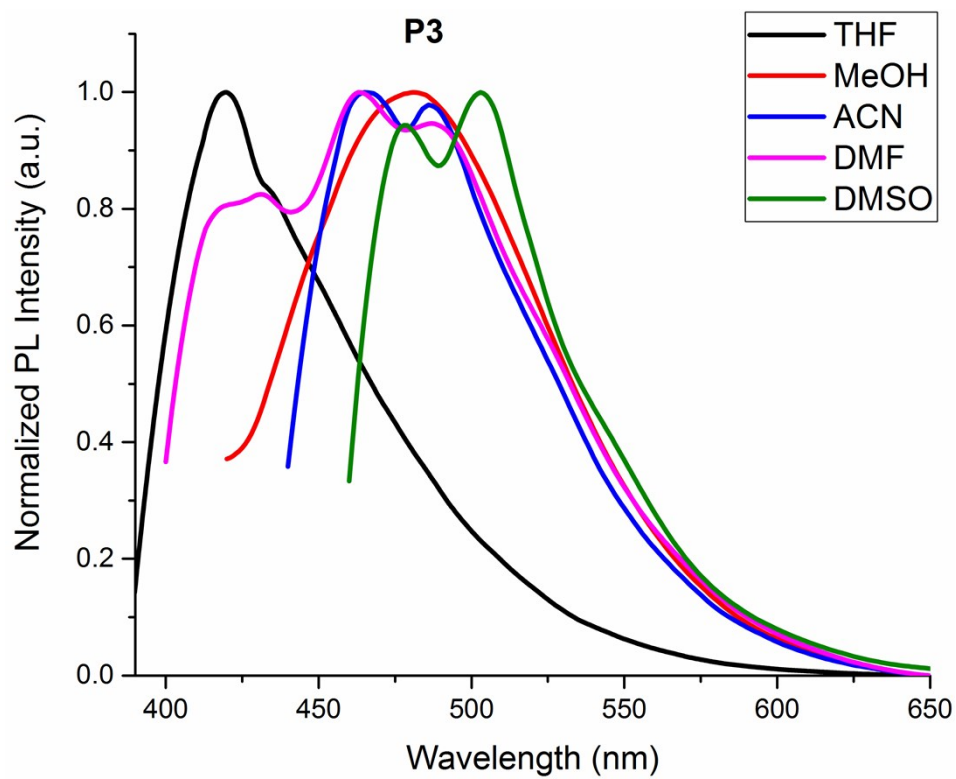

**Figure S30.** PL spectra of molecule **P3** in solvent of varying polarity.

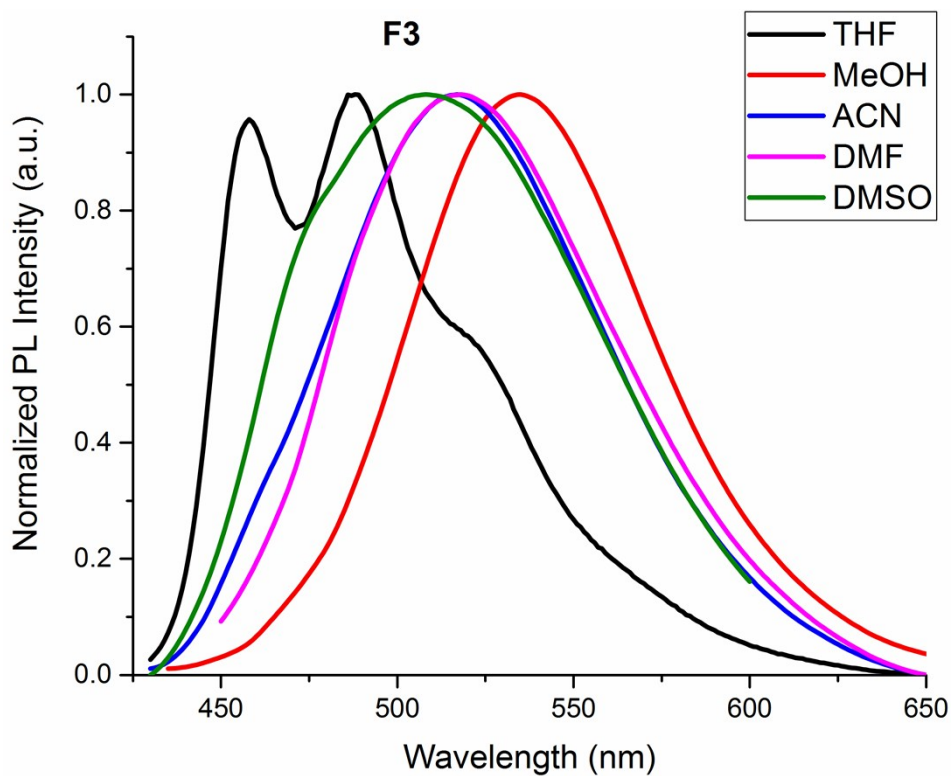

**Figure S31.** PL spectra of molecule **F3** in solvent of varying polarity.

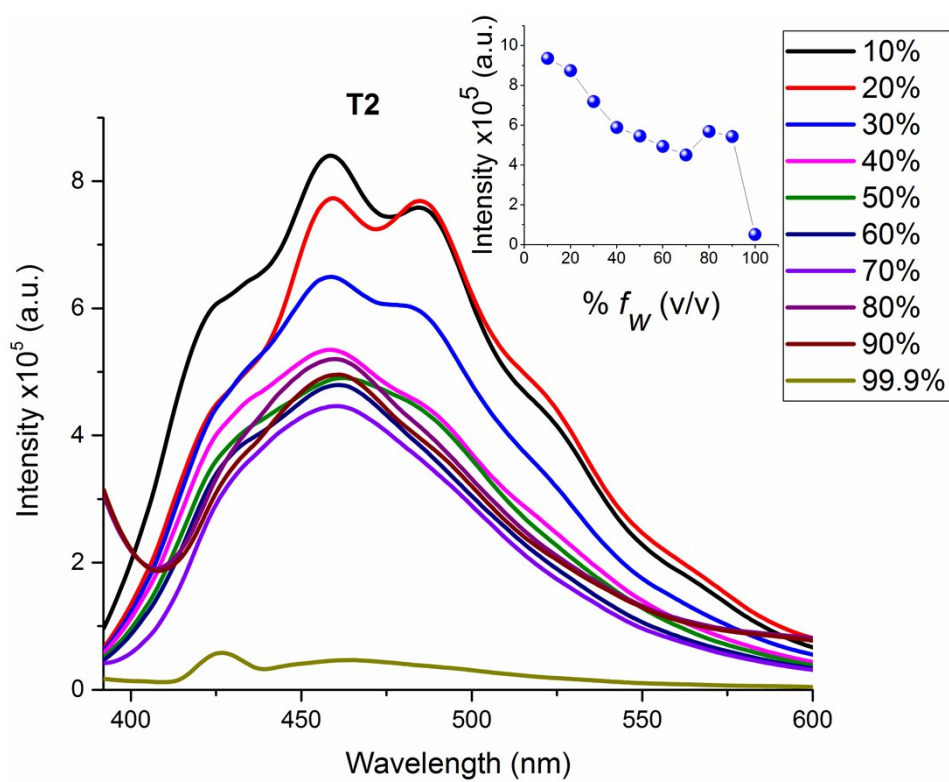

**Figure S32.** Fluorescence emission spectrum of **T2** with varying  $f_w$  and inset gives the intensity value with varying  $f_w$

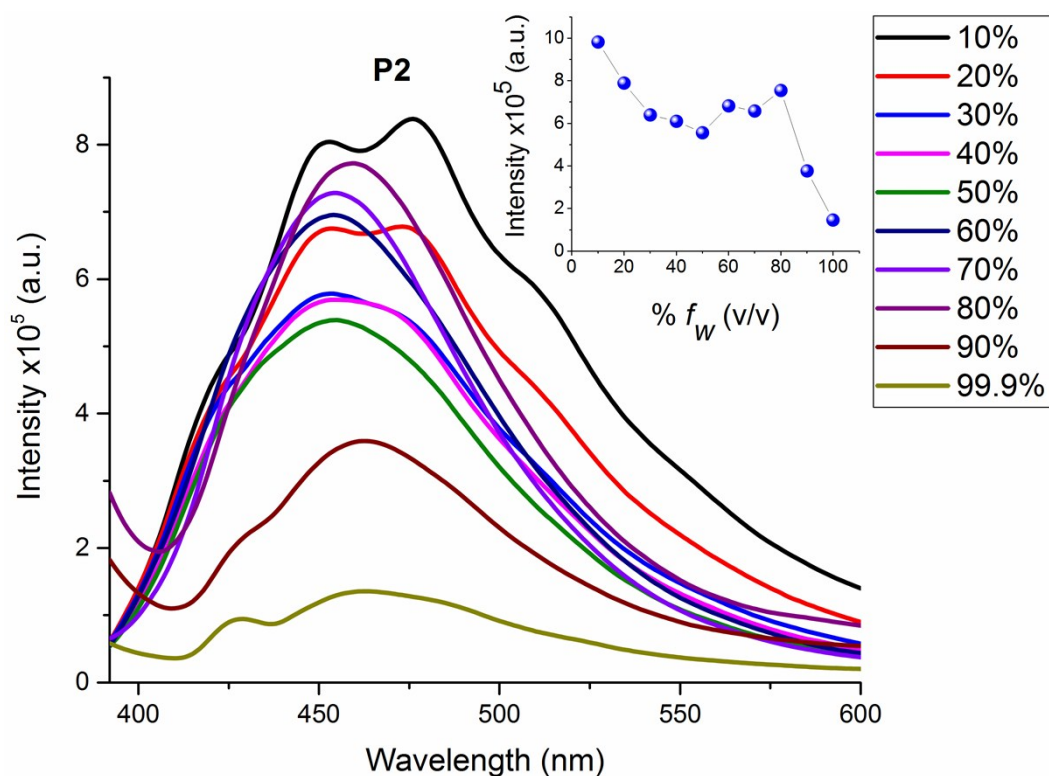

**Figure S33.** Fluorescence emission spectrum of **P2** with varying  $f_w$  and inset gives the intensity value with varying  $f_w$

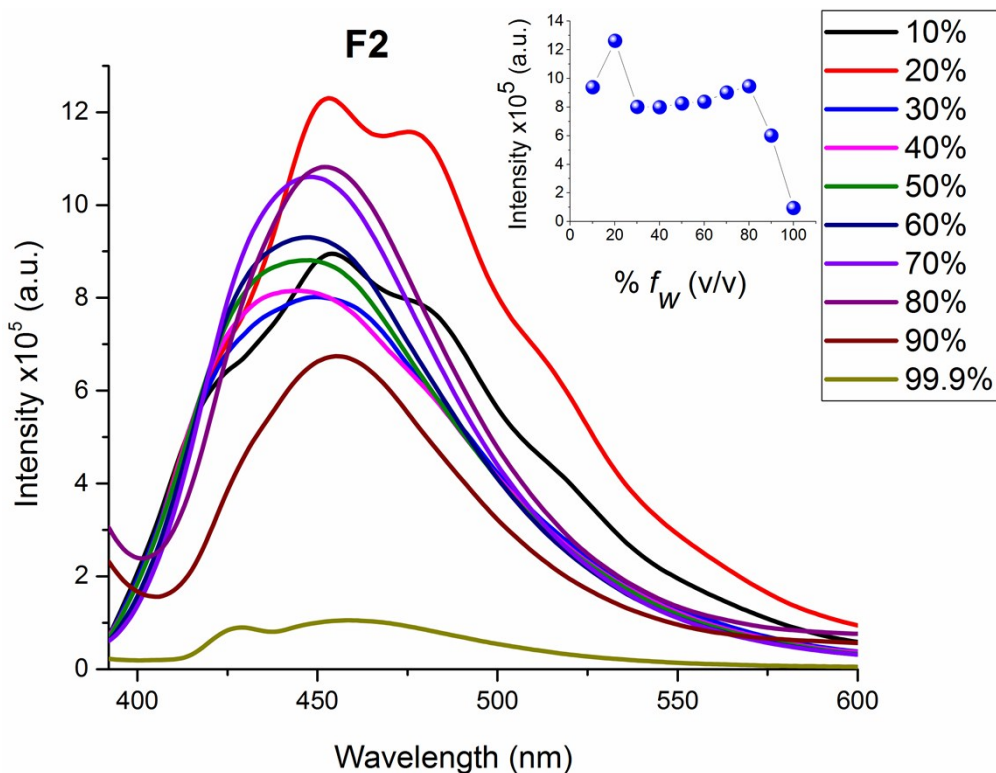

**Figure S34.** Fluorescence emission spectrum of **F2** with varying  $f_w$  and inset gives the intensity value with varying  $f_w$



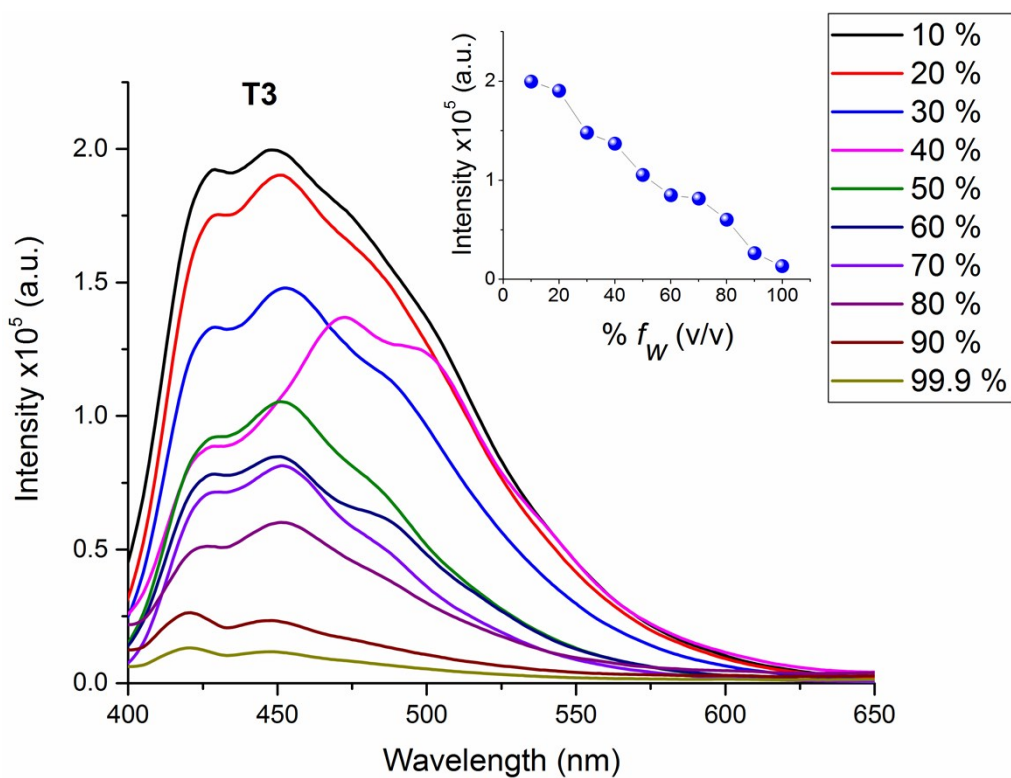

**Figure S35.** Fluorescence emission spectrum of T3 with varying  $f_w$  and inset gives the intensity value with varying  $f_w$

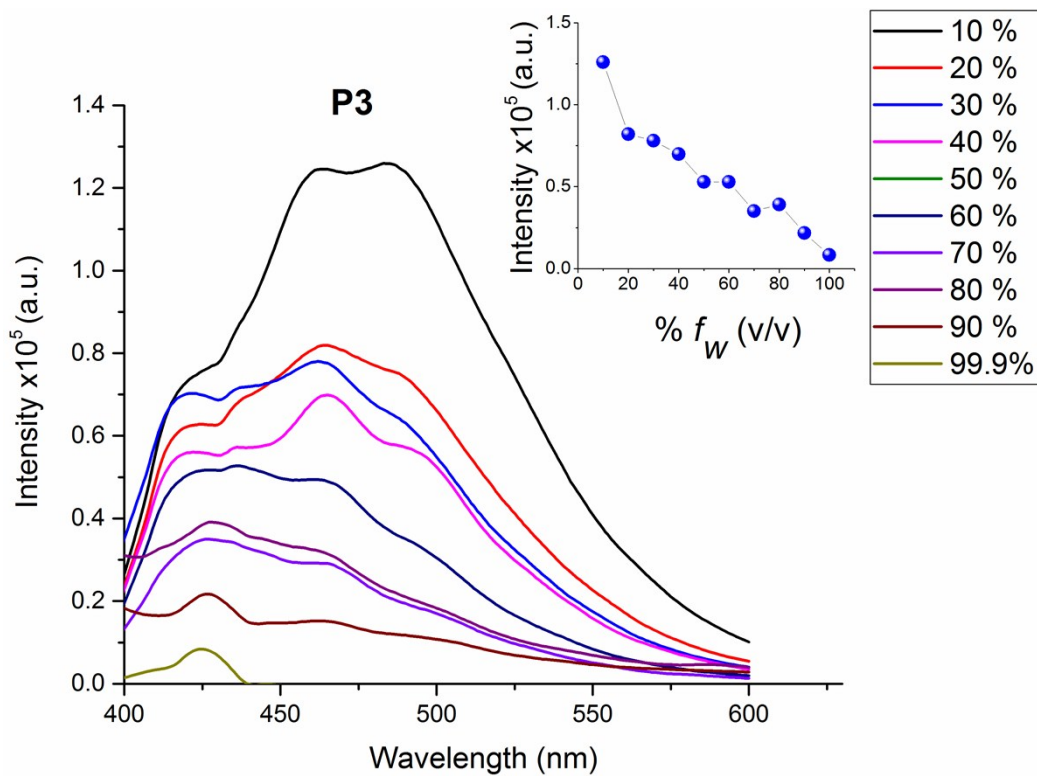

**Figure S36.** Fluorescence emission spectrum of P3 with varying  $f_w$  and inset gives the intensity value with varying  $f_w$

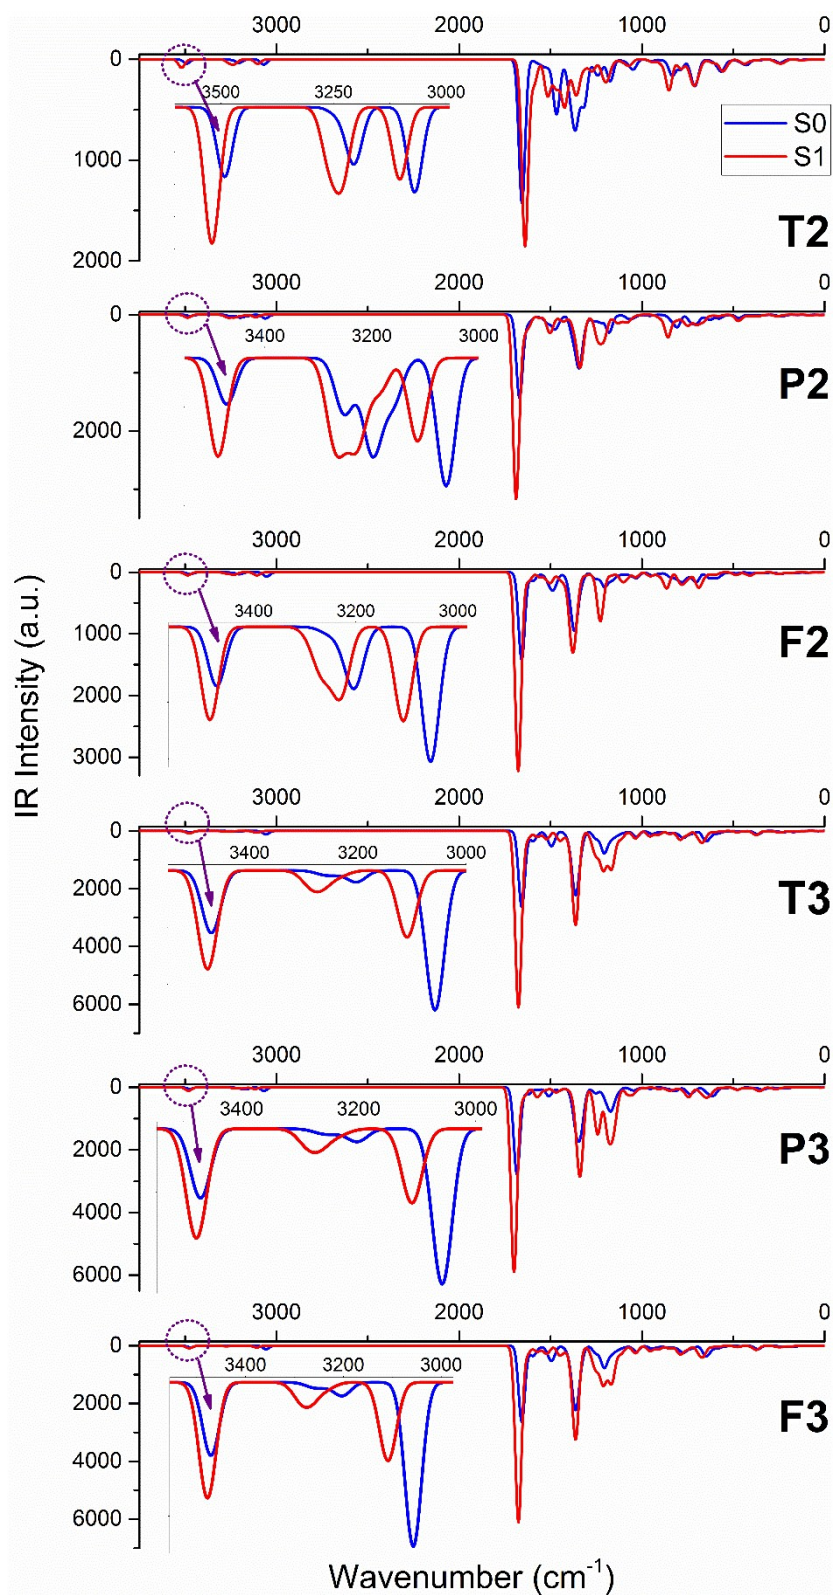

**Figure S37.** Vibrational stretching frequency of all the molecules in  $S_0$  and  $S_1$  states; specifically focusing N-H stretching frequency



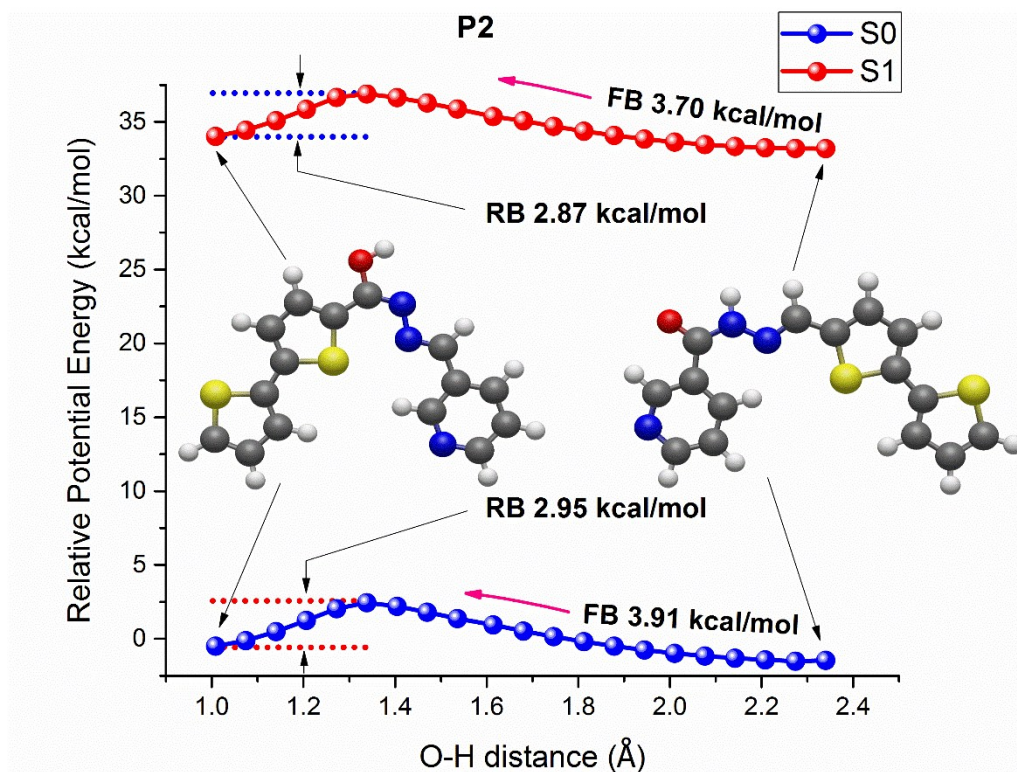

**Figure S38.** Single point energies of molecule P2 in the S<sub>0</sub> and S<sub>1</sub> states calculated by B3LYP and CAM-B3LYP

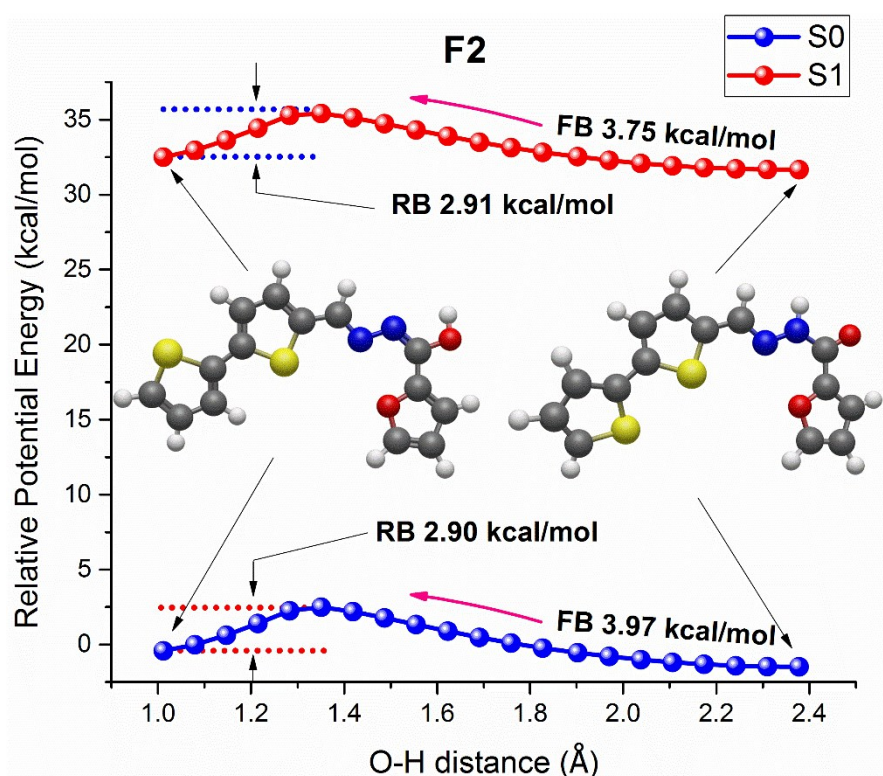

**Figure S39.** Single point energies of molecule F2 in the S<sub>0</sub> and S<sub>1</sub> states calculated by B3LYP and CAM-B3LYP

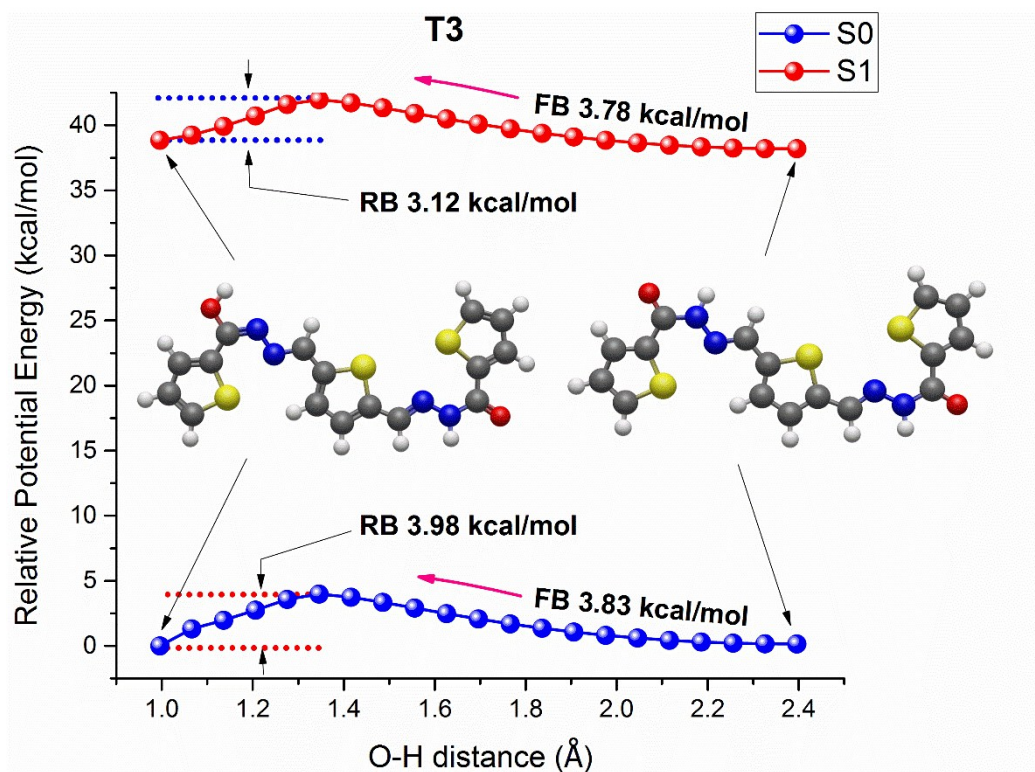

**Figure S40.** Single point energies of molecule **T3** in the  $S_0$  and  $S_1$  states calculated by B3LYP and CAM-B3LYP

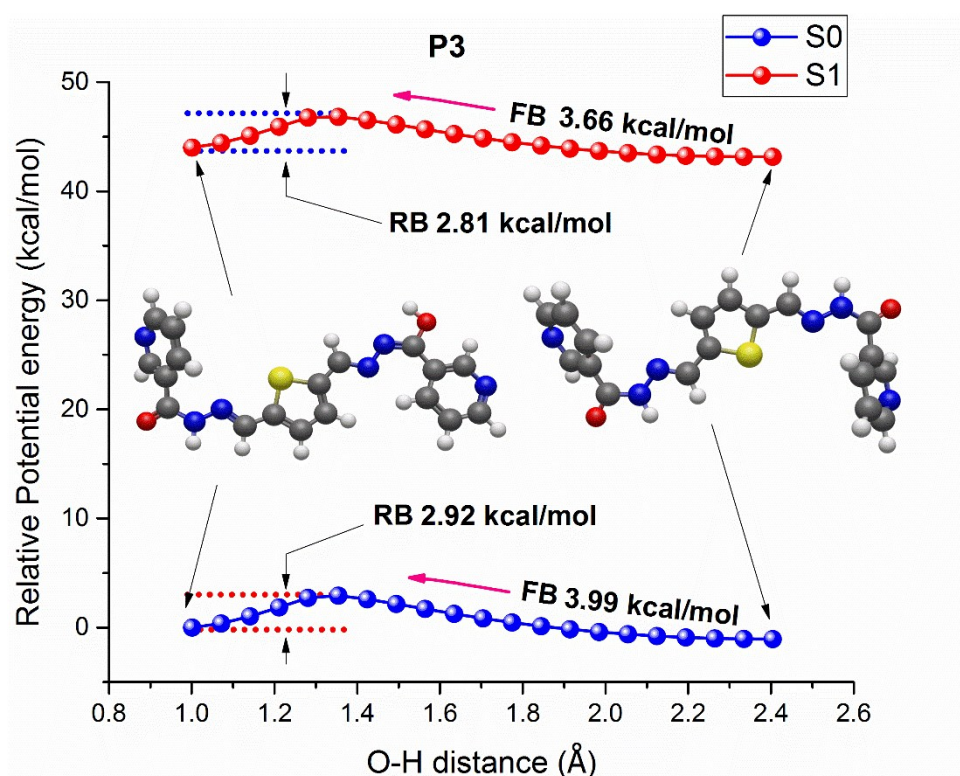

**Figure S41.** Single point energies of molecule **P3** in the  $S_0$  and  $S_1$  states calculated by B3LYP and CAM-B3LYP



**TABLE S1.** Vibrational –NH stretching frequency of all molecules at state  $S_0$  and  $S_1$ 

| Molecule  | N-H Stretching ( $\text{cm}^{-1}$ ) |       | Shift ( $\text{cm}^{-1}$ ) |
|-----------|-------------------------------------|-------|----------------------------|
|           | $S_0$                               | $S_1$ |                            |
| <b>T1</b> | 3488                                | 3464  | -23                        |
| <b>P1</b> | 3477                                | 3456  | -21                        |
| <b>F1</b> | 3473                                | 3455  | -18                        |
| <b>T2</b> | 3473                                | 3486  | 13                         |
| <b>P2</b> | 3473                                | 3488  | 15                         |
| <b>F2</b> | 3471                                | 3486  | 15                         |
| <b>T3</b> | 3485                                | 3489  | 4                          |
| <b>P3</b> | 3475                                | 3482  | 7                          |
| <b>F3</b> | 3469                                | 3477  | 8                          |

**TABLE S2.** Computed optical parameters of molecules, keto absorbance and emission, enol emission, oscillator strengths, composition and CI(%) calculated at DFT/B3LYP and TD-DFT/CAM-B3LYP for ground and excited state

| Molecule  | Type       | Transition            | Energy (nm) | Oscillator strength | Composition                                                   | CI (%)        |
|-----------|------------|-----------------------|-------------|---------------------|---------------------------------------------------------------|---------------|
| <b>T2</b> | k abs      | $S_0 \rightarrow S_1$ | 362         | 0.9357              | H(82) $\rightarrow$ L(83)                                     | 93.37         |
|           | k emission | $S_1 \rightarrow S_0$ | 402         | 1.0520              | H(82) $\rightarrow$ L(83)                                     | 96.76         |
|           | e emission | $S_1 \rightarrow S_0$ | 428         | 0.9304              | H(82) $\rightarrow$ L(83)<br>H-1(81) $\rightarrow$ L+1(84)    | 96.34<br>2.33 |
| <b>P2</b> | k abs      | $S_0 \rightarrow S_1$ | 367         | 0.9721              | H(81) $\rightarrow$ L(82)                                     | 93.61         |
|           | k emission | $S_1 \rightarrow S_0$ | 407         | 1.0776              | H(81) $\rightarrow$ L(82)                                     | 96.74         |
|           | e emission | $S_1 \rightarrow S_0$ | 426         | 1.1281              | H(81) $\rightarrow$ L(82)                                     | 96.51         |
| <b>F2</b> | k abs      | $S_0 \rightarrow S_1$ | 352         | 0.9325              | H(78) $\rightarrow$ L(79)                                     | 94.00         |
|           | k emission | $S_1 \rightarrow S_0$ | 392         | 1.044               | H(78) $\rightarrow$ L(79)                                     | 97.02         |
|           | e emission | $S_1 \rightarrow S_0$ | 421         | 1.145               | H(78) $\rightarrow$ L(79)<br>H-1(77) $\rightarrow$ L+1(80)    | 96.62<br>2.15 |
| <b>T3</b> | k abs      | $S_0 \rightarrow S_1$ | 363         | 1.3251              | H(100) $\rightarrow$ L(101)                                   | 93.36         |
|           | k emission | $S_1 \rightarrow S_0$ | 402         | 1.4021              | H(100) $\rightarrow$ L(101)                                   | 96.2          |
|           | e emission | $S_1 \rightarrow S_0$ | 430         | 1.5366              | H(100) $\rightarrow$ L(101)<br>H-1(99) $\rightarrow$ L+1(102) | 94.65<br>3.05 |
| <b>P3</b> | k abs      | $S_0 \rightarrow S_1$ | 350         | 1.3135              | H(98) $\rightarrow$ L(99)                                     | 95.05         |
|           | k emission | $S_1 \rightarrow S_0$ | 389         | 1.3953              | H(98) $\rightarrow$ L(99)                                     | 96.81         |
|           | e emission | $S_1 \rightarrow S_0$ | 410         | 1.5919              | H(98) $\rightarrow$ L(99)                                     | 96.52         |

|           |            |                       |     |        |                                                           |               |
|-----------|------------|-----------------------|-----|--------|-----------------------------------------------------------|---------------|
| <b>F3</b> | k abs      | $S_0 \rightarrow S_1$ | 358 | 1.3541 | H(92 $\rightarrow$ L(93)                                  | 93.73         |
|           | k emission | $S_1 \rightarrow S_0$ | 397 | 1.4234 | H(92 $\rightarrow$ L(93)                                  | 96.38         |
|           | e emission | $S_1 \rightarrow S_0$ | 420 | 1.6346 | H(92 $\rightarrow$ L(93)<br>H-1(91) $\rightarrow$ L+1(94) | 96.23<br>2.14 |
